# Supplementary material
Source: PubMed Central journal article supplement (PMC3214647)
Supplement: NIHMS324835-supplement-Supp_Figure_S2.pdf [file NIHMS324835-supplement-Supp_Figure_S2.pdf]

**A**

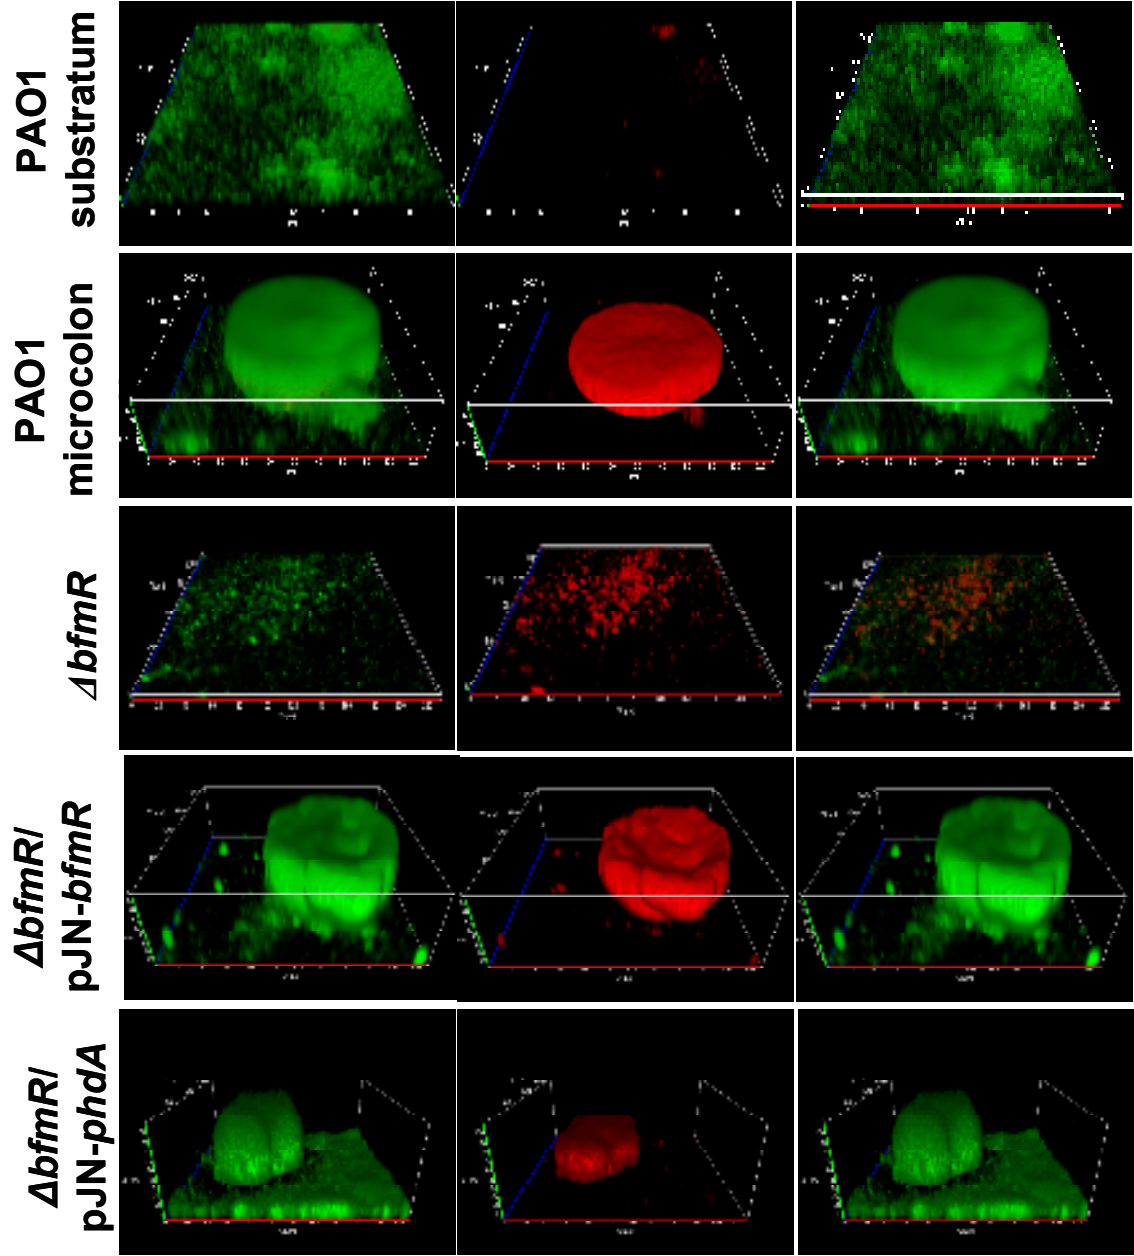

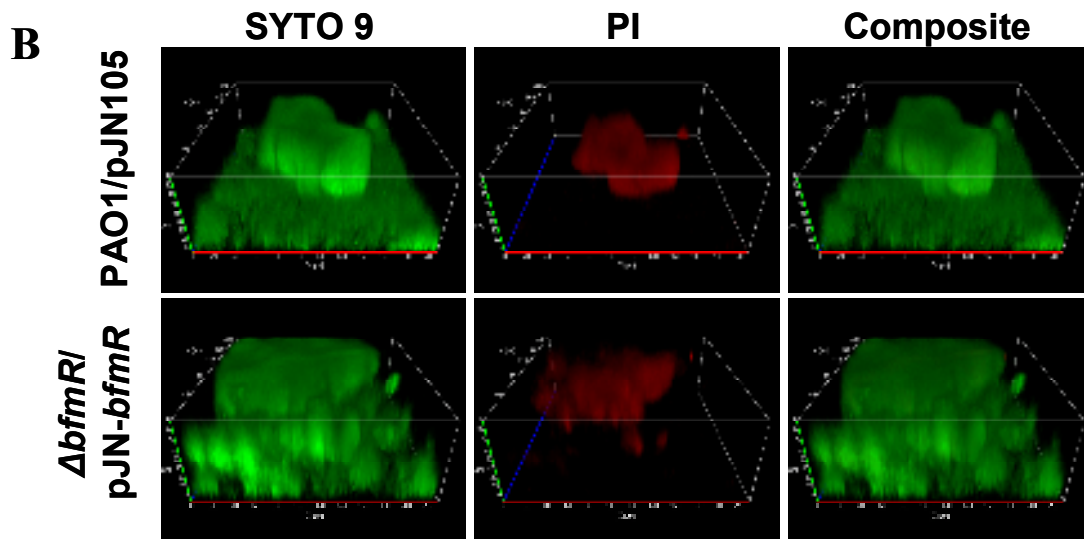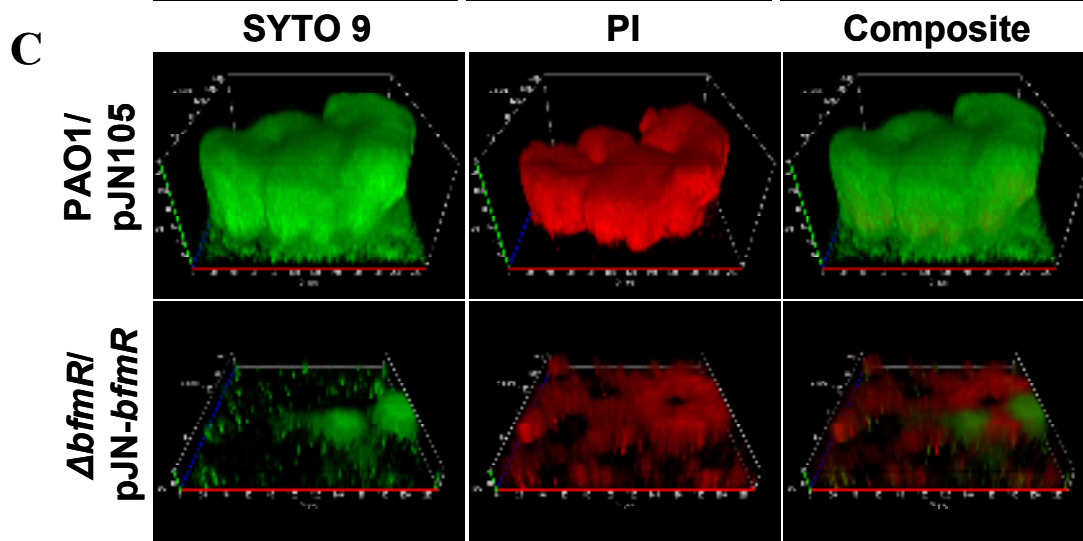

**D**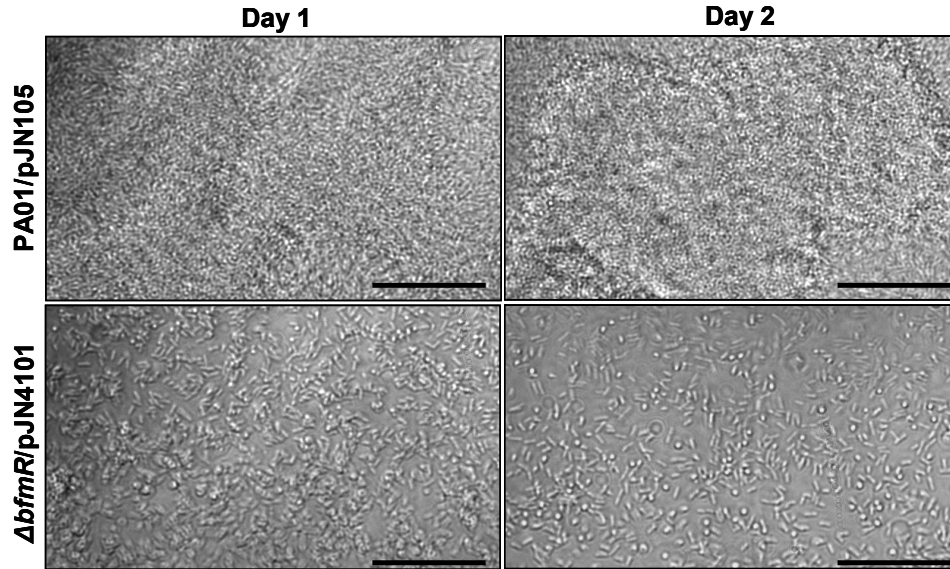

**Figure S2. Detection of increased cell death as indicated by propidium iodide staining upon inactivation of *bfmR* in biofilms.** (A) PAO1,  $\Delta bfmR$ , and complemented  $\Delta bfmR$  biofilms, grown under continuous flow conditions for 144 hr, were stained with SYTO 9 and propidium iodide (PI) using the LIVE/DEAD BacLight viability kit. CSLM-acquired images were analyzed by splitting the green (SYTO 9) and red (PI) channels. (B) Confocal images of wild type PAO1 bearing the empty pJN105 vector and complemented  $\Delta bfmR$  bearing pJN-*bfmR* were grown in the presence of arabinose for 144 hr. (C) Wild type PAO1 bearing the empty pJN105 vector and complemented  $\Delta bfmR$  bearing pJN-*bfmR* were grown in the presence of arabinose for 144 hr, at which point, arabinose was removed in order to inactivate transcription from the pBAD promoter. Biofilms were allowed to grow for an additional 72 hrs before confocal images were acquired. (D) Brightfield images of *P. aeruginosa* PAO1/pJN105 and  $\Delta bfmR$ /pJN-*bfmR* biofilms acquired 24 and 48 hrs post arabinose removal. Black bar = 25  $\mu$ m.
