# Supplementary material
Source: PubMed Central journal article supplement (PMC3214647)
Supplement: NIHMS324835-supplement-Supp_Table_S1-S4.pdf [file NIHMS324835-supplement-Supp_Table_S1-S4.pdf]

## SUPPLEMENTARY MATERIAL

Pages 1-47      Supplementary Tables S1-S4  
 Pages 48-57    Supplementary Figures S1-S6  
 Page 58        Supplementary References

### SUPPLEMENTARY TABLES

**Table S1. Genes that are significantly upregulated in *AbfmR* biofilms compared to *P. aeruginosa* PAO1 biofilms.**

| Significantly Up-Regulated Genes | Fold Change | <i>T</i> -test <i>P</i> -value |
|----------------------------------|-------------|--------------------------------|
| ig_1063544_1064555_at            | 3.25        | 0.125                          |
| ig_1117390_1118158_at            | 3.56        | 0.011                          |
| ig_1118158_1117390_at            | 2.93        | 0.029                          |
| ig_1204781_1205771_at            | 4.76        | 0                              |
| ig_1255042_1254309_at            | 2.38        | 0.157                          |
| ig_1428080_1427453_at            | 5.31        | 0.135                          |
| ig_1489095_1489815_at            | 5.03        | 0.013                          |
| ig_1802453_1803626_at            | 5.94        | 0.116                          |
| ig_189120_188448_at              | 4.76        | 0.006                          |
| ig_1947041_1948502_at            | 4.08        | 0.001                          |
| ig_1948502_1947041_at            | 4.72        | 0.082                          |
| ig_2068728_2069490_at            | 2.46        | 0.067                          |
| ig_2069490_2068728_at            | 4.08        | 0.015                          |
| ig_2116265_2117030_at            | 2.85        | 0.001                          |
| ig_2226144_2226879_at            | 4.89        | 0.091                          |
| ig_2226879_2226144_at            | 4.56        | 0.004                          |
| ig_2240302_2239267_at            | 3.18        | 0.105                          |
| ig_224101_223454_at              | 4.63        | 0.213                          |
| ig_2243603_2244492_at            | 4.56        | 0.021                          |
| ig_2244492_2243603_at            | 2.69        | 0.037                          |
| ig_2281578_2282480_at            | 5.74        | 0.039                          |
| ig_2282480_2281578_at            | 4.23        | 0.001                          |
| ig_2341640_2342493_at            | 5.17        | 0.021                          |
| ig_2342493_2341640_at            | 2.89        | 0.002                          |
| ig_2557964_2558918_s_at          | 2.83        | 0.035                          |
| ig_2558918_2557964_s_at          | 3.68        | 0.006                          |
| ig_2737193_2737881_at            | 3.29        | 0.013                          |
| ig_2894451_2893827_at            | 2.75        | 0.023                          |
| ig_2902217_2901558_at            | 6.11        | 0.027                          |
| ig_2906165_2905549_at            | 4.96        | 0.046                          |
| ig_2918966_2918211_at            | 3.89        | 0.121                          |
| ig_297561_299081_at              | 6.11        | 0.109                          |
| ig_299081_297561_at              | 4.92        | 0.001                          |
| ig_3051348_3051956_at            | 3.29        | 0.127                          |
| ig_3112150_3112877_at            | 5.03        | 0.017                          |
| ig_3112877_3112150_at            | 2.75        | 0.047                          |
| ig_3122585_3123598_at            | 8.17        | 0.12                           |
| ig_3123598_3122585_at            | 3.12        | 0.017                          |
| ig_3129728_3129070_at            | 2.43        | 0.036                          |
| ig_3206252_3206914_at            | 4.99        | 0.035                          |

**SUPPLEMENTARY MATERIAL**

|                       |       |       |
|-----------------------|-------|-------|
| ig_3206914_3206252_at | 6.59  | 0.144 |
| ig_3265847_3265210_at | 3.10  | 0.011 |
| ig_3475169_3475955_at | 4.99  | 0.043 |
| ig_3475955_3475169_at | 2.87  | 0.019 |
| ig_3514564_3515415_at | 8.22  | 0.082 |
| ig_3527428_3526677_at | 3.41  | 0.091 |
| ig_3545073_3545880_at | 3.03  | 0.087 |
| ig_3546926_3547688_at | 2.66  | 0.2   |
| ig_3648915_3649704_at | 3.81  | 0.038 |
| ig_3649704_3648915_at | 2.97  | 0.001 |
| ig_3677080_3677719_at | 3.32  | 0.002 |
| ig_3677719_3677080_at | 3.03  | 0.01  |
| ig_3705160_3705889_at | 5.50  | 0.029 |
| ig_4240578_4241341_at | 2.57  | 0.022 |
| ig_4294604_4297249_at | 6.50  | 0.065 |
| ig_4297249_4294604_at | 4.79  | 0.085 |
| ig_4321433_4320819_at | 4.86  | 0.042 |
| ig_4326394_4327696_at | 6.19  | 0.066 |
| ig_4327696_4326394_at | 2.68  | 0.011 |
| ig_4448892_4448217_at | 3.66  | 0.022 |
| ig_4509996_4510970_at | 3.01  | 0.025 |
| ig_4584530_4585148_at | 3.63  | 0.071 |
| ig_4629184_4629943_at | 5.06  | 0.001 |
| ig_4705304_4705955_at | 3.68  | 0.094 |
| ig_4888194_4889111_at | 3.84  | 0.028 |
| ig_4956733_4956028_at | 9.06  | 0.254 |
| ig_5087407_5086695_at | 6.19  | 0.013 |
| ig_5131427_5130767_at | 6.59  | 0     |
| ig_5208463_5207621_at | 4.47  | 0.007 |
| ig_5242558_5243177_at | 6.59  | 0.071 |
| ig_5243177_5242558_at | 2.99  | 0.005 |
| ig_5309325_5308424_at | 5.58  | 0.115 |
| ig_53521_56546_at     | 3.36  | 0.035 |
| ig_5458499_5457716_at | 4.17  | 0.007 |
| ig_5513111_5513731_at | 13.18 | 0.227 |
| ig_5542072_5541409_at | 2.22  | 0.081 |
| ig_5563964_5563286_at | 3.58  | 0.007 |
| ig_56546_53521_at     | 7.21  | 0.058 |
| ig_5775619_5774806_at | 3.07  | 0.008 |
| ig_5820909_5820113_at | 6.87  | 0.081 |
| ig_5992382_5991130_at | 3.46  | 0.006 |
| ig_6090705_6092045_at | 3.92  | 0.067 |
| ig_64729_65339_at     | 3.68  | 0.055 |
| ig_65339_64729_at     | 2.00  | 0.11  |
| ig_69272_68616_at     | 2.55  | 0.006 |
| ig_727608_721556_s_at | 15.03 | 0.289 |
| ig_785174_785969_at   | 8.22  | 0.193 |
| ig_785969_785174_at   | 3.53  | 0.19  |
| ig_789144_788253_at   | 2.27  | 0.028 |
| ig_863300_864095_at   | 2.23  | 0.056 |
| ig_864095_863300_at   | 6.92  | 0.065 |

## SUPPLEMENTARY MATERIAL

|                     |      |       |
|---------------------|------|-------|
| ig_884172_884799_at | 2.55 | 0.163 |
| ig_884799_884172_at | 5.50 | 0.019 |
| ig_901046_901934_at | 4.76 | 0.252 |
| ig_991198_991830_at | 2.69 | 0.025 |
| PA0005_at           | 2.33 | 0.02  |
| PA0028_at           | 2.30 | 0.034 |
| PA0029_at           | 3.53 | 0.008 |
| PA0030_at           | 4.59 | 0.014 |
| PA0032_at           | 2.93 | 0.014 |
| PA0033_at           | 2.60 | 0.042 |
| PA0037_trpI_at      | 3.23 | 0.021 |
| PA0042_at           | 2.33 | 0.081 |
| PA0052_at           | 2.83 | 0.131 |
| PA0053_at           | 2.30 | 0.002 |
| PA0057_at           | 3.78 | 0.012 |
| PA0061_at           | 2.99 | 0.031 |
| PA0064_at           | 2.08 | 0.137 |
| PA0069_at           | 3.23 | 0.008 |
| PA0071_at           | 2.85 | 0.002 |
| PA0073_at           | 2.17 | 0.187 |
| PA0092_at           | 2.17 | 0.025 |
| PA0097_at           | 2.28 | 0.171 |
| PA0103_at           | 3.66 | 0.121 |
| PA0104_at           | 3.81 | 0.053 |
| PA0116_at           | 2.28 | 0.081 |
| PA0118_at           | 3.92 | 0.042 |
| PA0122_at           | 3.71 | 0.002 |
| PA0123_at           | 2.66 | 0.05  |
| PA0128_at           | 3.81 | 0.012 |
| PA0129_gabP_at      | 2.10 | 0.185 |
| PA0130_at           | 2.00 | 0.165 |
| PA0132_at           | 2.23 | 0.049 |
| PA0133_at           | 2.19 | 0.188 |
| PA0135_at           | 4.38 | 0.017 |
| PA0136_at           | 3.58 | 0.01  |
| PA0137_at           | 4.47 | 0.105 |
| PA0138_at           | 3.29 | 0.006 |
| PA0144_at           | 2.28 | 0.022 |
| PA0149_at           | 3.66 | 0.066 |
| PA0150_at           | 4.38 | 0.007 |
| PA0151_at           | 2.97 | 0.028 |
| PA0152_pcaQ_at      | 3.03 | 0.011 |
| PA0161_at           | 3.07 | 0.038 |
| PA0162_at           | 2.93 | 0.015 |
| PA0163_at           | 7.21 | 0.096 |
| PA0164_at           | 3.48 | 0.003 |
| PA0168_at           | 3.27 | 0.001 |
| PA0174_at           | 2.30 | 0.021 |
| PA0182_at           | 4.82 | 0.02  |
| PA0183_atsA_at      | 3.78 | 0.051 |
| PA0185_at           | 4.50 | 0.006 |

## SUPPLEMENTARY MATERIAL

|                 |      |       |
|-----------------|------|-------|
| PA0186_at       | 3.27 | 0.05  |
| PA0187_at       | 2.99 | 0.013 |
| PA0188_at       | 3.56 | 0.016 |
| PA0189_at       | 3.63 | 0.072 |
| PA0191_at       | 3.73 | 0.12  |
| PA0192_at       | 3.73 | 0.025 |
| PA0194_at       | 3.92 | 0.046 |
| PA0197_at       | 3.16 | 0.015 |
| PA0198_exbB1_at | 4.20 | 0.062 |
| PA0199_exbD1_at | 4.96 | 0.03  |
| PA0200_i_at     | 2.00 | 0.142 |
| PA0201_at       | 2.46 | 0.032 |
| PA0202_at       | 3.39 | 0.008 |
| PA0204_at       | 4.63 | 0.069 |
| PA0206_at       | 2.39 | 0.017 |
| PA0207_at       | 3.39 | 0.058 |
| PA0209_at       | 2.60 | 0.086 |
| PA0210_mdcC_at  | 2.85 | 0.139 |
| PA0211_mdcD_at  | 2.75 | 0.008 |
| PA0213_at       | 4.59 | 0.044 |
| PA0215_at       | 2.10 | 0.049 |
| PA0217_at       | 2.20 | 0.014 |
| PA0219_at       | 3.07 | 0.038 |
| PA0221_at       | 2.83 | 0.066 |
| PA0223_at       | 3.25 | 0.002 |
| PA0225_at       | 2.25 | 0.034 |
| PA0226_at       | 2.55 | 0.031 |
| PA0227_at       | 3.01 | 0.086 |
| PA0228_pcaF_at  | 2.75 | 0.03  |
| PA0232_pcaC_at  | 3.03 | 0.109 |
| PA0235_pcaK_at  | 6.92 | 0.124 |
| PA0236_at       | 2.53 | 0.003 |
| PA0238_at       | 4.66 | 0.016 |
| PA0239_at       | 3.81 | 0.002 |
| PA0240_at       | 3.58 | 0.055 |
| PA0241_at       | 4.06 | 0.038 |
| PA0242_at       | 3.39 | 0.029 |
| PA0245_aroQ2_at | 2.55 | 0.011 |
| PA0247_pobA_at  | 4.20 | 0.015 |
| PA0248_at       | 3.14 | 0.002 |
| PA0251_at       | 4.06 | 0.134 |
| PA0254_at       | 2.58 | 0.012 |
| PA0257_at       | 3.43 | 0.051 |
| PA0258_at       | 2.55 | 0.043 |
| PA0259_at       | 2.01 | 0.019 |
| PA0260_at       | 2.62 | 0.152 |
| PA0261_at       | 2.95 | 0.121 |
| PA0264_at       | 4.82 | 0.051 |
| PA0268_at       | 2.27 | 0.023 |
| PA0270_at       | 2.28 | 0.003 |
| PA0271_at       | 2.68 | 0.086 |

## SUPPLEMENTARY MATERIAL

|                 |      |       |
|-----------------|------|-------|
| PA0275_at       | 2.51 | 0.009 |
| PA0279_at       | 4.41 | 0.018 |
| PA0288_speB1_at | 5.35 | 0.091 |
| PA0290_at       | 2.13 | 0.003 |
| PA0306_at       | 4.92 | 0.028 |
| PA0308_at       | 2.43 | 0.04  |
| PA0310_at       | 2.35 | 0.016 |
| PA0321_at       | 3.86 | 0.077 |
| PA0325_at       | 4.41 | 0.029 |
| PA0333_at       | 2.46 | 0.132 |
| PA0334_at       | 4.06 | 0.014 |
| PA0339_at       | 2.22 | 0.059 |
| PA0343_at       | 2.38 | 0.062 |
| PA0345_at       | 3.10 | 0.059 |
| PA0347_glpQ_at  | 2.20 | 0.035 |
| PA0348_at       | 2.89 | 0.011 |
| PA0349_at       | 6.45 | 0.012 |
| PA0351_at       | 2.25 | 0.02  |
| PA0360_at       | 2.41 | 0.089 |
| PA0368_at       | 3.01 | 0.05  |
| PA0375_ftsX_at  | 2.10 | 0.026 |
| PA0377_at       | 2.00 | 0.046 |
| PA0378_at       | 3.53 | 0.053 |
| PA0379_at       | 2.13 | 0.082 |
| PA0383_at       | 4.53 | 0.015 |
| PA0386_at       | 2.01 | 0.042 |
| PA0397_at       | 3.16 | 0.064 |
| PA0398_at       | 2.55 | 0.179 |
| PA0417_at       | 4.03 | 0.024 |
| PA0424_mexR_at  | 2.04 | 0.104 |
| PA0434_at       | 5.13 | 0.073 |
| PA0435_at       | 5.70 | 0.03  |
| PA0444_at       | 3.20 | 0.112 |
| PA0457_at       | 2.41 | 0.012 |
| PA0460_at       | 2.17 | 0     |
| PA0466_at       | 4.26 | 0.012 |
| PA0470_at       | 3.01 | 0.079 |
| PA0471_at       | 2.08 | 0.178 |
| PA0472_at       | 2.07 | 0.009 |
| PA0475_at       | 3.86 | 0.032 |
| PA0479_at       | 2.41 | 0.04  |
| PA0481_at       | 5.10 | 0     |
| PA0486_at       | 2.08 | 0.084 |
| PA0488_at       | 2.14 | 0.042 |
| PA0494_at       | 3.12 | 0.04  |
| PA0495_at       | 3.61 | 0.027 |
| PA0499_at       | 4.69 | 0.009 |
| PA0522_r_at     | 2.85 | 0.106 |
| PA0531_at       | 2.33 | 0.082 |
| PA0533_at       | 3.03 | 0.147 |
| PA0539_at       | 6.06 | 0.068 |

## SUPPLEMENTARY MATERIAL

|                 |       |       |
|-----------------|-------|-------|
| PA0544_at       | 2.23  | 0.021 |
| PA0549_at       | 2.48  | 0.003 |
| PA0559_at       | 2.75  | 0.002 |
| PA0560_at       | 3.05  | 0.005 |
| PA0561_at       | 5.24  | 0.119 |
| PA0564_at       | 3.14  | 0.064 |
| PA0568_at       | 2.83  | 0.013 |
| PA0569_at       | 2.35  | 0.012 |
| PA0574_at       | 3.12  | 0.005 |
| PA0580_gcp_at   | 3.25  | 0.09  |
| PA0583_at       | 2.87  | 0.006 |
| PA0584_cca_at   | 2.41  | 0.085 |
| PA0585_at       | 2.14  | 0.168 |
| PA0599_at       | 2.01  | 0.237 |
| PA0610_prtN_at  | 3.14  | 0.038 |
| PA0612_i_at     | 2.51  | 0.021 |
| PA0613_at       | 3.32  | 0.075 |
| PA0614_at       | 2.01  | 0.157 |
| PA0632_at       | 2.69  | 0.029 |
| PA0643_at       | 2.85  | 0.232 |
| PA0669_at       | 5.24  | 0.057 |
| PA0670_at       | 4.29  | 0.001 |
| PA0672_at       | 2.33  | 0.033 |
| PA0673_at       | 2.81  | 0.012 |
| PA0675_at       | 4.50  | 0.163 |
| PA0676_at       | 3.76  | 0.004 |
| PA0677_at       | 4.86  | 0.003 |
| PA0678_i_at     | 5.28  | 0.169 |
| PA0679_at       | 5.86  | 0.101 |
| PA0684_at       | 5.35  | 0.093 |
| PA0689_at       | 3.43  | 0.067 |
| PA0693_exbB2_at | 3.34  | 0.036 |
| PA0694_exbD2_at | 2.43  | 0.061 |
| PA0696_at       | 3.48  | 0.111 |
| PA0697_at       | 5.28  | 0.004 |
| PA0699_at       | 3.05  | 0.007 |
| PA0700_at       | 3.32  | 0.082 |
| PA0703_at       | 3.32  | 0.074 |
| PA0708_at       | 3.71  | 0.089 |
| PA0709_at       | 3.97  | 0.036 |
| PA0710_gloA2_at | 4.47  | 0.05  |
| PA0711_at       | 3.66  | 0.029 |
| PA0712_at       | 2.64  | 0.004 |
| PA0724_at       | 8.94  | 0.289 |
| PA0725_at       | 13.93 | 0.253 |
| PA0726_at       | 11.96 | 0.35  |
| PA0727_at       | 7.16  | 0.136 |
| PA0751_at       | 4.53  | 0.119 |
| PA0752_at       | 3.58  | 0.027 |
| PA0755_at       | 2.07  | 0.013 |
| PA0756_at       | 3.18  | 0.024 |

## SUPPLEMENTARY MATERIAL

|                 |      |       |
|-----------------|------|-------|
| PA0757_at       | 2.85 | 0.006 |
| PA0760_at       | 2.30 | 0.007 |
| PA0772_recO_at  | 2.91 | 0.122 |
| PA0774_at       | 3.01 | 0.099 |
| PA0776_at       | 2.16 | 0.055 |
| PA0781_at       | 2.85 | 0.085 |
| PA0785_at       | 4.26 | 0.162 |
| PA0786_at       | 6.96 | 0.144 |
| PA0787_at       | 2.77 | 0.005 |
| PA0790_at       | 4.50 | 0.031 |
| PA0791_at       | 3.05 | 0.029 |
| PA0798_at       | 2.50 | 0.124 |
| PA0800_at       | 2.93 | 0.002 |
| PA0801_at       | 4.14 | 0.069 |
| PA0802_i_at     | 3.92 | 0.012 |
| PA0805_at       | 3.36 | 0.301 |
| PA0806_i_at     | 3.20 | 0.096 |
| PA0809_at       | 4.56 | 0.024 |
| PA0812_at       | 2.10 | 0.055 |
| PA0813_at       | 2.64 | 0.097 |
| PA0816_at       | 4.66 | 0.002 |
| PA0817_at       | 2.45 | 0.045 |
| PA0818_at       | 2.35 | 0.14  |
| PA0819_f_at     | 2.97 | 0.012 |
| PA0823_at       | 5.13 | 0.035 |
| PA0828_at       | 4.76 | 0.073 |
| PA0829_at       | 3.20 | 0.039 |
| PA0843_plcR_at  | 2.66 | 0.012 |
| PA0845_at       | 5.03 | 0.26  |
| PA0846_at       | 2.04 | 0.001 |
| PA0849_trxB2_at | 3.07 | 0.005 |
| PA0859_at       | 2.17 | 0.145 |
| PA0860_at       | 2.38 | 0.012 |
| PA0864_at       | 3.10 | 0.028 |
| PA0866_aroP2_at | 2.51 | 0.021 |
| PA0875_at       | 7.06 | 0.065 |
| PA0881_at       | 3.86 | 0.013 |
| PA0884_at       | 3.03 | 0.047 |
| PA0907_at       | 2.87 | 0.039 |
| PA0909_i_at     | 2.77 | 0.162 |
| PA0912_at       | 5.28 | 0.005 |
| PA0921_at       | 2.03 | 0.136 |
| PA0922_at       | 2.48 | 0.201 |
| PA0923_dinP_at  | 3.53 | 0.123 |
| PA0929_at       | 4.59 | 0.065 |
| PA0930_at       | 3.71 | 0.091 |
| PA0931_at       | 3.66 | 0.076 |
| PA0932_cysM_at  | 2.00 | 0.184 |
| PA0933_ygcA_at  | 2.31 | 0.026 |
| PA0935_at       | 2.14 | 0.042 |
| PA0940_at       | 2.19 | 0.045 |

## SUPPLEMENTARY MATERIAL

|                |      |       |
|----------------|------|-------|
| PA0942_at      | 3.07 | 0     |
| PA0948_at      | 3.32 | 0.068 |
| PA0975_at      | 2.60 | 0.006 |
| PA0978_s_at    | 3.48 | 0.065 |
| PA0979_s_at    | 2.87 | 0.005 |
| PA0980_at      | 3.92 | 0.054 |
| PA0987_at      | 5.66 | 0.01  |
| PA0988_at      | 2.91 | 0.008 |
| PA0989_at      | 3.14 | 0.045 |
| PA0993_at      | 7.52 | 0.142 |
| PA0994_at      | 4.35 | 0.124 |
| PA0995_ogt_at  | 2.08 | 0.08  |
| PA1001_phnA_at | 2.30 | 0.076 |
| PA1006_at      | 2.85 | 0.097 |
| PA1014_at      | 2.13 | 0.047 |
| PA1016_at      | 2.06 | 0.043 |
| PA1017_pauA_at | 4.63 | 0.087 |
| PA1018_at      | 3.94 | 0.11  |
| PA1021_at      | 2.08 | 0.027 |
| PA1025_at      | 5.06 | 0     |
| PA1026_at      | 2.11 | 0.022 |
| PA1028_at      | 3.29 | 0.068 |
| PA1029_at      | 2.23 | 0.06  |
| PA1030_at      | 2.23 | 0.149 |
| PA1038_at      | 2.50 | 0.089 |
| PA1044_at      | 2.57 | 0.061 |
| PA1045_at      | 2.01 | 0.071 |
| PA1046_at      | 2.91 | 0.022 |
| PA1051_at      | 2.87 | 0.002 |
| PA1056_at      | 2.38 | 0.024 |
| PA1058_at      | 2.27 | 0.159 |
| PA1059_at      | 3.66 | 0.055 |
| PA1075_at      | 2.60 | 0.104 |
| PA1104_fliI_at | 3.12 | 0.066 |
| PA1105_fliJ_at | 2.83 | 0.015 |
| PA1107_at      | 2.75 | 0.154 |
| PA1111_at      | 3.46 | 0.02  |
| PA1112_at      | 2.07 | 0.015 |
| PA1120_at      | 2.17 | 0.212 |
| PA1122_at      | 2.35 | 0.112 |
| PA1125_at      | 2.13 | 0.024 |
| PA1127_at      | 3.03 | 0.033 |
| PA1130_at      | 3.97 | 0.04  |
| PA1131_at      | 6.41 | 0.016 |
| PA1133_at      | 3.92 | 0.082 |
| PA1134_at      | 2.69 | 0.046 |
| PA1136_at      | 4.06 | 0.031 |
| PA1137_at      | 3.81 | 0.044 |
| PA1139_at      | 2.28 | 0.048 |
| PA1143_at      | 4.20 | 0.067 |
| PA1144_at      | 3.58 | 0.07  |



## SUPPLEMENTARY MATERIAL

|                |      |       |
|----------------|------|-------|
| PA1145_at      | 2.17 | 0.245 |
| PA1146_at      | 3.92 | 0.066 |
| PA1147_at      | 6.96 | 0.031 |
| PA1149_at      | 3.71 | 0.108 |
| PA1150_pys2_at | 2.16 | 0.038 |
| PA1153_at      | 3.48 | 0.062 |
| PA1163_at      | 3.61 | 0.038 |
| PA1165_at      | 3.84 | 0.01  |
| PA1167_at      | 2.30 | 0.06  |
| PA1168_at      | 3.16 | 0.065 |
| PA1181_at      | 2.08 | 0.002 |
| PA1183_dctA_at | 2.58 | 0.122 |
| PA1184_at      | 3.78 | 0.004 |
| PA1185_at      | 3.76 | 0.001 |
| PA1188_at      | 2.53 | 0.023 |
| PA1194_at      | 3.56 | 0.003 |
| PA1197_at      | 2.00 | 0.133 |
| PA1209_at      | 2.01 | 0.096 |
| PA1212_at      | 5.54 | 0.004 |
| PA1213_at      | 3.53 | 0.007 |
| PA1217_at      | 5.10 | 0.017 |
| PA1219_at      | 3.68 | 0.035 |
| PA1220_at      | 4.32 | 0.001 |
| PA1221_at      | 3.92 | 0.02  |
| PA1222_at      | 2.57 | 0.025 |
| PA1224_at      | 4.00 | 0.008 |
| PA1226_at      | 2.60 | 0.008 |
| PA1230_at      | 4.00 | 0.017 |
| PA1231_at      | 5.24 | 0.011 |
| PA1232_at      | 4.96 | 0.002 |
| PA1233_at      | 3.71 | 0.017 |
| PA1235_at      | 4.59 | 0.079 |
| PA1237_at      | 3.46 | 0.03  |
| PA1241_at      | 3.32 | 0.032 |
| PA1242_at      | 3.61 | 0.097 |
| PA1246_aprD_at | 2.36 | 0.009 |
| PA1247_aprE_at | 2.13 | 0.02  |
| PA1248_aprF_at | 2.11 | 0.008 |
| PA1251_at      | 3.51 | 0.011 |
| PA1253_at      | 4.00 | 0.006 |
| PA1254_at      | 2.45 | 0.121 |
| PA1266_at      | 4.00 | 0.026 |
| PA1281_cobV_at | 3.86 | 0.012 |
| PA1283_at      | 2.57 | 0.097 |
| PA1285_at      | 2.51 | 0.073 |
| PA1286_at      | 4.29 | 0.001 |
| PA1291_at      | 4.69 | 0.117 |
| PA1300_at      | 2.19 | 0.021 |
| PA1301_at      | 2.87 | 0.031 |
| PA1302_at      | 2.79 | 0.005 |
| PA1309_at      | 3.51 | 0.062 |

## SUPPLEMENTARY MATERIAL

|                |      |       |
|----------------|------|-------|
| PA1311_phnX_at | 2.69 | 0.007 |
| PA1313_at      | 7.41 | 0.043 |
| PA1314_at      | 3.25 | 0.001 |
| PA1315_at      | 2.43 | 0.083 |
| PA1316_at      | 3.94 | 0.135 |
| PA1321_cyoE_at | 3.43 | 0.074 |
| PA1328_at      | 2.43 | 0.026 |
| PA1329_at      | 3.71 | 0.051 |
| PA1330_at      | 2.66 | 0.007 |
| PA1331_at      | 2.89 | 0.028 |
| PA1332_at      | 3.12 | 0.003 |
| PA1334_at      | 4.20 | 0.023 |
| PA1347_at      | 3.25 | 0.058 |
| PA1348_at      | 2.66 | 0.006 |
| PA1351_at      | 3.23 | 0.028 |
| PA1352_at      | 5.03 | 0.002 |
| PA1356_at      | 2.06 | 0.071 |
| PA1357_at      | 2.36 | 0.042 |
| PA1359_at      | 3.68 | 0.035 |
| PA1362_i_at    | 2.38 | 0.124 |
| PA1363_at      | 2.20 | 0.154 |
| PA1364_at      | 3.78 | 0.045 |
| PA1365_at      | 3.63 | 0.013 |
| PA1367_at      | 4.56 | 0.005 |
| PA1368_at      | 3.73 | 0.001 |
| PA1374_at      | 5.13 | 0.009 |
| PA1378_at      | 2.07 | 0.006 |
| PA1381_at      | 5.54 | 0.036 |
| PA1382_at      | 2.73 | 0.024 |
| PA1383_at      | 2.64 | 0.044 |
| PA1384_galE_at | 9.51 | 0.057 |
| PA1386_at      | 6.96 | 0.032 |
| PA1387_at      | 5.28 | 0.053 |
| PA1388_at      | 4.17 | 0.017 |
| PA1391_at      | 3.84 | 0.076 |
| PA1392_at      | 5.54 | 0.01  |
| PA1393_cysC_at | 3.48 | 0.084 |
| PA1394_at      | 3.94 | 0.01  |
| PA1395_at      | 6.50 | 0.038 |
| PA1396_at      | 2.99 | 0.046 |
| PA1399_at      | 3.05 | 0.007 |
| PA1400_at      | 4.44 | 0.023 |
| PA1401_at      | 2.08 | 0.001 |
| PA1403_at      | 3.97 | 0.01  |
| PA1405_at      | 4.47 | 0.002 |
| PA1407_at      | 2.87 | 0.073 |
| PA1409_aphA_at | 2.57 | 0.004 |
| PA1410_at      | 3.43 | 0.046 |
| PA1411_at      | 3.39 | 0.001 |
| PA1412_at      | 4.56 | 0.003 |
| PA1413_at      | 2.66 | 0.023 |

**SUPPLEMENTARY MATERIAL**

|                |      |       |
|----------------|------|-------|
| PA1415_at      | 3.10 | 0.014 |
| PA1427_at      | 3.36 | 0.008 |
| PA1429_at      | 2.50 | 0.122 |
| PA1435_at      | 3.10 | 0.052 |
| PA1438_at      | 3.76 | 0.064 |
| PA1447_fliQ_at | 2.39 | 0.01  |
| PA1449_flhB_at | 3.43 | 0.004 |
| PA1451_at      | 2.39 | 0.055 |
| PA1466_at      | 3.43 | 0.008 |
| PA1467_at      | 4.47 | 0.032 |
| PA1468_at      | 3.78 | 0.011 |
| PA1469_at      | 2.99 | 0.019 |
| PA1472_at      | 3.51 | 0.079 |
| PA1475_ccmA_at | 2.46 | 0     |
| PA1483_cycH_at | 2.06 | 0.111 |
| PA1484_at      | 3.12 | 0.039 |
| PA1486_at      | 3.94 | 0.065 |
| PA1491_at      | 2.07 | 0.023 |
| PA1497_at      | 5.35 | 0.064 |
| PA1498_pykF_at | 4.41 | 0.059 |
| PA1502_gcl_at  | 2.60 | 0.014 |
| PA1508_at      | 4.59 | 0.05  |
| PA1511_at      | 2.77 | 0.019 |
| PA1519_at      | 3.53 | 0.075 |
| PA1529_lig_at  | 2.66 | 0.103 |
| PA1535_at      | 4.56 | 0.017 |
| PA1540_at      | 6.06 | 0.043 |
| PA1542_at      | 2.97 | 0.06  |
| PA1547_at      | 3.53 | 0.091 |
| PA1558_at      | 2.46 | 0.005 |
| PA1559_at      | 3.36 | 0.214 |
| PA1560_at      | 3.58 | 0.005 |
| PA1563_at      | 3.39 | 0.006 |
| PA1566_at      | 3.16 | 0.1   |
| PA1570_at      | 3.94 | 0.048 |
| PA1576_at      | 2.04 | 0.1   |
| PA1577_at      | 3.34 | 0.061 |
| PA1578_at      | 4.38 | 0.023 |
| PA1591_at      | 3.36 | 0.065 |
| PA1594_at      | 2.38 | 0.065 |
| PA1598_at      | 3.43 | 0.003 |
| PA1599_at      | 3.23 | 0.003 |
| PA1605_at      | 2.60 | 0.056 |
| PA1606_at      | 3.58 | 0.012 |
| PA1613_at      | 2.00 | 0.052 |
| PA1622_at      | 6.41 | 0.032 |
| PA1625_at      | 3.68 | 0.002 |
| PA1630_at      | 2.22 | 0.031 |
| PA1631_at      | 4.89 | 0.149 |
| PA1632_kdpF_at | 6.19 | 0.105 |
| PA1633_kdpA_at | 3.32 | 0.034 |

## SUPPLEMENTARY MATERIAL

|                |      |       |
|----------------|------|-------|
| PA1634_kdpB_at | 2.91 | 0.003 |
| PA1635_kdpC_at | 3.18 | 0.072 |
| PA1636_kdpD_at | 2.41 | 0.022 |
| PA1645_at      | 2.10 | 0.05  |
| PA1649_at      | 2.73 | 0.004 |
| PA1650_at      | 2.17 | 0.158 |
| PA1652_at      | 2.75 | 0.054 |
| PA1653_at      | 3.41 | 0.016 |
| PA1655_at      | 2.16 | 0.112 |
| PA1656_at      | 3.73 | 0.046 |
| PA1660_at      | 3.58 | 0.038 |
| PA1661_at      | 3.66 | 0.003 |
| PA1662_at      | 2.19 | 0.06  |
| PA1663_at      | 2.81 | 0.002 |
| PA1664_at      | 3.53 | 0.251 |
| PA1667_at      | 2.00 | 0.094 |
| PA1668_at      | 4.41 | 0.043 |
| PA1669_at      | 2.89 | 0.009 |
| PA1670_stp1_at | 4.06 | 0.113 |
| PA1675_at      | 2.28 | 0.093 |
| PA1676_at      | 2.87 | 0.064 |
| PA1685_masA_at | 2.50 | 0.119 |
| PA1692_at      | 3.10 | 0.01  |
| PA1697_at      | 2.51 | 0.095 |
| PA1702_i_at    | 6.54 | 0.057 |
| PA1703_pcrD_at | 3.05 | 0.066 |
| PA1724_pscK_at | 3.01 | 0.028 |
| PA1725_pscL_at | 4.41 | 0.09  |
| PA1739_at      | 3.27 | 0.008 |
| PA1740_at      | 5.78 | 0.082 |
| PA1743_at      | 4.23 | 0.066 |
| PA1755_at      | 2.31 | 0.007 |
| PA1773_at      | 3.01 | 0.08  |
| PA1780_nirD_at | 6.73 | 0.061 |
| PA1782_at      | 3.23 | 0.005 |
| PA1783_nasA_at | 5.21 | 0.138 |
| PA1786_at      | 3.18 | 0.02  |
| PA1788_at      | 2.66 | 0.028 |
| PA1797_at      | 3.97 | 0.097 |
| PA1798_at      | 2.00 | 0.134 |
| PA1809_at      | 2.14 | 0.146 |
| PA1819_at      | 2.30 | 0.112 |
| PA1825_at      | 2.16 | 0.117 |
| PA1827_at      | 3.14 | 0.054 |
| PA1834_at      | 3.36 | 0.136 |
| PA1844_at      | 3.27 | 0.045 |
| PA1848_at      | 6.45 | 0.007 |
| PA1851_at      | 3.27 | 0.011 |
| PA1854_at      | 3.66 | 0.001 |
| PA1856_at      | 6.28 | 0.083 |
| PA1860_at      | 2.31 | 0.006 |

## SUPPLEMENTARY MATERIAL

|                |      |       |
|----------------|------|-------|
| PA1864_at      | 3.18 | 0     |
| PA1865_at      | 3.25 | 0.086 |
| PA1866_at      | 2.22 | 0.043 |
| PA1867_at      | 5.21 | 0.069 |
| PA1869_at      | 3.05 | 0.021 |
| PA1870_at      | 4.14 | 0.087 |
| PA1873_at      | 2.77 | 0.035 |
| PA1878_at      | 2.04 | 0.211 |
| PA1879_at      | 2.93 | 0.039 |
| PA1883_at      | 3.29 | 0.057 |
| PA1885_at      | 3.07 | 0.103 |
| PA1886_polB_at | 2.64 | 0.1   |
| PA1889_at      | 2.22 | 0.026 |
| PA1901_s_at    | 3.68 | 0.051 |
| PA1903_s_at    | 3.23 | 0.015 |
| PA1905_s_at    | 3.71 | 0.056 |
| PA1906_at      | 2.83 | 0.039 |
| PA1907_at      | 3.41 | 0.03  |
| PA1909_at      | 2.85 | 0.007 |
| PA1910_at      | 2.55 | 0.001 |
| PA1913_at      | 2.16 | 0.159 |
| PA1916_at      | 3.94 | 0.045 |
| PA1919_at      | 3.73 | 0.062 |
| PA1922_at      | 3.76 | 0.051 |
| PA1923_at      | 4.89 | 0.028 |
| PA1932_at      | 2.51 | 0.06  |
| PA1934_at      | 2.10 | 0.014 |
| PA1936_at      | 5.82 | 0.087 |
| PA1945_at      | 3.12 | 0.057 |
| PA1954_at      | 2.06 | 0.007 |
| PA1955_at      | 3.84 | 0.133 |
| PA1956_at      | 4.03 | 0.072 |
| PA1959_bacA_at | 2.69 | 0.002 |
| PA1965_at      | 3.68 | 0.054 |
| PA1973_pqqF_at | 2.51 | 0.099 |
| PA1976_at      | 4.03 | 0.025 |
| PA1977_at      | 3.92 | 0.022 |
| PA1979_at      | 3.53 | 0.006 |
| PA1998_at      | 2.69 | 0.019 |
| PA2006_at      | 3.10 | 0.024 |
| PA2017_at      | 2.30 | 0.004 |
| PA2019_at      | 4.17 | 0.037 |
| PA2022_at      | 4.63 | 0.1   |
| PA2027_at      | 2.31 | 0.047 |
| PA2034_at      | 2.73 | 0.037 |
| PA2035_at      | 2.07 | 0.07  |
| PA2037_at      | 2.91 | 0.096 |
| PA2041_at      | 3.58 | 0.087 |
| PA2048_at      | 2.99 | 0.021 |
| PA2050_at      | 4.96 | 0.043 |
| PA2051_at      | 5.03 | 0.007 |

## SUPPLEMENTARY MATERIAL

|                |      |       |
|----------------|------|-------|
| PA2052_cynS_at | 2.07 | 0.01  |
| PA2055_at      | 3.73 | 0.016 |
| PA2056_at      | 2.95 | 0.026 |
| PA2059_at      | 2.95 | 0.027 |
| PA2064_pcoB_at | 2.06 | 0.183 |
| PA2066_at      | 2.85 | 0.012 |
| PA2068_at      | 6.45 | 0.062 |
| PA2069_at      | 3.84 | 0.002 |
| PA2074_at      | 4.23 | 0.041 |
| PA2075_at      | 2.97 | 0.003 |
| PA2077_at      | 3.56 | 0.004 |
| PA2083_at      | 3.46 | 0.003 |
| PA2084_at      | 4.08 | 0.045 |
| PA2085_at      | 4.11 | 0.116 |
| PA2086_at      | 3.73 | 0.025 |
| PA2090_at      | 3.58 | 0.004 |
| PA2091_at      | 5.74 | 0.006 |
| PA2093_at      | 3.86 | 0.002 |
| PA2094_at      | 4.23 | 0.012 |
| PA2098_at      | 4.69 | 0.027 |
| PA2099_at      | 5.54 | 0.005 |
| PA2100_at      | 2.83 | 0.025 |
| PA2103_at      | 2.08 | 0.073 |
| PA2104_at      | 2.19 | 0.008 |
| PA2105_at      | 2.79 | 0.015 |
| PA2106_at      | 2.57 | 0.026 |
| PA2107_at      | 4.20 | 0.154 |
| PA2115_at      | 2.20 | 0.003 |
| PA2120_at      | 2.55 | 0.061 |
| PA2125_at      | 3.63 | 0.063 |
| PA2129_at      | 4.26 | 0.032 |
| PA2130_at      | 3.14 | 0.036 |
| PA2131_at      | 5.46 | 0.001 |
| PA2132_at      | 3.51 | 0.005 |
| PA2135_at      | 4.72 | 0.011 |
| PA2137_at      | 2.77 | 0.036 |
| PA2138_at      | 4.17 | 0.012 |
| PA2140_at      | 2.50 | 0.011 |
| PA2141_at      | 2.73 | 0.014 |
| PA2142_at      | 3.05 | 0     |
| PA2145_at      | 2.89 | 0.032 |
| PA2148_at      | 2.89 | 0.048 |
| PA2151_at      | 3.18 | 0.034 |
| PA2157_at      | 2.00 | 0.02  |
| PA2163_at      | 2.00 | 0.033 |
| PA2166_at      | 2.01 | 0.122 |
| PA2168_at      | 2.39 | 0.002 |
| PA2178_at      | 4.14 | 0     |
| PA2180_at      | 2.00 | 0.041 |
| PA2181_at      | 3.94 | 0.059 |
| PA2184_at      | 2.33 | 0.116 |

## SUPPLEMENTARY MATERIAL

|                |      |       |
|----------------|------|-------|
| PA2186_r_at    | 2.38 | 0.074 |
| PA2187_at      | 3.43 | 0.035 |
| PA2188_at      | 3.01 | 0.057 |
| PA2194_hcnB_at | 2.20 | 0.009 |
| PA2195_hcnC_at | 2.71 | 0.056 |
| PA2199_at      | 3.12 | 0.064 |
| PA2200_at      | 3.14 | 0.003 |
| PA2201_at      | 3.39 | 0.109 |
| PA2206_at      | 2.01 | 0.03  |
| PA2207_at      | 4.03 | 0.016 |
| PA2208_at      | 4.14 | 0.022 |
| PA2210_at      | 4.23 | 0.009 |
| PA2211_at      | 2.06 | 0.095 |
| PA2216_at      | 3.46 | 0.007 |
| PA2218_at      | 2.75 | 0.04  |
| PA2224_at      | 3.32 | 0.172 |
| PA2225_at      | 5.66 | 0.031 |
| PA2226_at      | 3.07 | 0.107 |
| PA2230_at      | 2.04 | 0.069 |
| PA2241_at      | 4.44 | 0.084 |
| PA2243_at      | 3.63 | 0.003 |
| PA2244_at      | 2.95 | 0.014 |
| PA2250_lpdV_at | 2.25 | 0.079 |
| PA2251_at      | 4.23 | 0.143 |
| PA2252_at      | 2.41 | 0.016 |
| PA2256_pvcC_at | 3.41 | 0.001 |
| PA2257_pvcD_at | 4.59 | 0.039 |
| PA2260_at      | 3.46 | 0.012 |
| PA2263_at      | 2.20 | 0.075 |
| PA2266_at      | 2.87 | 0.027 |
| PA2267_at      | 2.60 | 0.226 |
| PA2269_at      | 5.31 | 0.186 |
| PA2271_i_at    | 2.06 | 0.126 |
| PA2272_pbpC_at | 3.56 | 0.09  |
| PA2274_at      | 4.38 | 0.021 |
| PA2275_at      | 3.71 | 0     |
| PA2277_arsR_at | 3.81 | 0.025 |
| PA2278_arsB_at | 5.10 | 0.098 |
| PA2282_at      | 2.35 | 0.025 |
| PA2284_at      | 5.31 | 0.005 |
| PA2285_at      | 2.13 | 0.045 |
| PA2286_at      | 4.03 | 0.005 |
| PA2288_r_at    | 2.45 | 0.063 |
| PA2289_at      | 2.81 | 0.003 |
| PA2292_at      | 3.66 | 0.016 |
| PA2295_at      | 3.97 | 0.026 |
| PA2296_at      | 3.48 | 0.018 |
| PA2297_at      | 2.10 | 0.063 |
| PA2298_at      | 2.93 | 0.047 |
| PA2299_at      | 2.04 | 0.052 |
| PA2300_chiC_at | 3.25 | 0.021 |

## SUPPLEMENTARY MATERIAL

|                 |      |       |
|-----------------|------|-------|
| PA2307_at       | 6.15 | 0.034 |
| PA2309_at       | 3.23 | 0.022 |
| PA2311_r_at     | 2.19 | 0.123 |
| PA2312_at       | 3.25 | 0.001 |
| PA2314_at       | 3.66 | 0.099 |
| PA2315_at       | 3.73 | 0.003 |
| PA2322_at       | 2.99 | 0.181 |
| PA2324_at       | 3.46 | 0.135 |
| PA2325_at       | 3.16 | 0.012 |
| PA2326_at       | 5.28 | 0.012 |
| PA2327_at       | 5.39 | 0.045 |
| PA2328_at       | 2.50 | 0.002 |
| PA2329_at       | 2.62 | 0.028 |
| PA2330_at       | 2.06 | 0.098 |
| PA2332_at       | 2.81 | 0.041 |
| PA2333_at       | 4.47 | 0.054 |
| PA2334_at       | 4.89 | 0.001 |
| PA2336_at       | 3.20 | 0.004 |
| PA2339_at       | 2.04 | 0.021 |
| PA2340_at       | 2.46 | 0.116 |
| PA2342_mtlD_at  | 3.81 | 0.012 |
| PA2343_mtlY_at  | 3.32 | 0.037 |
| PA2344_mtlZ_at  | 2.66 | 0.01  |
| PA2349_at       | 4.29 | 0.002 |
| PA2353_at       | 2.57 | 0.141 |
| PA2354_at       | 4.06 | 0.079 |
| PA2355_at       | 3.12 | 0.016 |
| PA2364_at       | 2.20 | 0.012 |
| PA2374_at       | 2.38 | 0.069 |
| PA2376_at       | 4.11 | 0.018 |
| PA2416_treA_at  | 3.36 | 0.1   |
| PA2418_at       | 2.66 | 0.013 |
| PA2421_at       | 4.59 | 0.035 |
| PA2422_at       | 3.41 | 0.012 |
| PA2428_at       | 2.69 | 0.019 |
| PA2429_at       | 3.36 | 0.008 |
| PA2431_at       | 2.97 | 0.026 |
| PA2435_at       | 2.99 | 0.029 |
| PA2438_at       | 2.79 | 0.105 |
| PA2440_at       | 2.36 | 0.032 |
| PA2442_gcvT2_at | 2.93 | 0.024 |
| PA2447_at       | 3.71 | 0.002 |
| PA2451_at       | 2.11 | 0.013 |
| PA2458_at       | 4.20 | 0.126 |
| PA2467_at       | 4.76 | 0.075 |
| PA2473_at       | 2.71 | 0.045 |
| PA2478_at       | 2.93 | 0.022 |
| PA2487_i_at     | 4.03 | 0.024 |
| PA2488_at       | 2.27 | 0.214 |
| PA2496_at       | 3.14 | 0.017 |
| PA2498_at       | 3.66 | 0.015 |



## SUPPLEMENTARY MATERIAL

|                |       |       |
|----------------|-------|-------|
| PA2502_at      | 3.61  | 0.025 |
| PA2503_at      | 2.11  | 0.008 |
| PA2505_at      | 3.51  | 0.001 |
| PA2506_at      | 2.23  | 0.027 |
| PA2507_catA_at | 2.39  | 0.022 |
| PA2510_catR_at | 2.53  | 0.004 |
| PA2513_antB_at | 3.51  | 0.022 |
| PA2514_antC_at | 5.17  | 0.006 |
| PA2517_xylY_at | 3.51  | 0.05  |
| PA2518_xylX_at | 3.71  | 0.001 |
| PA2523_at      | 3.05  | 0.004 |
| PA2524_at      | 3.61  | 0.016 |
| PA2525_at      | 2.39  | 0.054 |
| PA2534_at      | 5.66  | 0.028 |
| PA2535_at      | 2.55  | 0.13  |
| PA2542_at      | 3.73  | 0.078 |
| PA2549_at      | 2.27  | 0.03  |
| PA2550_at      | 2.17  | 0.06  |
| PA2558_at      | 2.14  | 0.11  |
| PA2563_at      | 4.82  | 0.041 |
| PA2565_at      | 2.87  | 0.025 |
| PA2568_at      | 2.95  | 0.125 |
| PA2569_at      | 4.11  | 0.044 |
| PA2570_pa1L_at | 10.85 | 0.01  |
| PA2574_at      | 2.77  | 0.004 |
| PA2576_at      | 4.14  | 0.106 |
| PA2578_at      | 3.03  | 0.104 |
| PA2580_at      | 2.77  | 0.019 |
| PA2588_at      | 2.68  | 0.067 |
| PA2589_at      | 4.44  | 0.064 |
| PA2590_at      | 4.47  | 0.103 |
| PA2591_at      | 2.57  | 0.021 |
| PA2594_at      | 2.28  | 0.023 |
| PA2597_at      | 2.73  | 0.018 |
| PA2598_at      | 3.97  | 0.001 |
| PA2599_at      | 3.41  | 0.003 |
| PA2600_at      | 5.70  | 0.069 |
| PA2610_at      | 2.66  | 0.018 |
| PA2628_at      | 2.69  | 0.168 |
| PA2635_at      | 2.79  | 0.029 |
| PA2636_at      | 3.66  | 0.002 |
| PA2662_at      | 3.39  | 0.095 |
| PA2668_at      | 2.69  | 0.001 |
| PA2671_at      | 4.66  | 0.05  |
| PA2672_at      | 5.70  | 0.022 |
| PA2673_at      | 5.94  | 0.042 |
| PA2674_at      | 3.86  | 0.039 |
| PA2675_at      | 6.54  | 0.022 |
| PA2676_at      | 4.63  | 0.011 |
| PA2678_at      | 4.44  | 0     |
| PA2681_at      | 4.47  | 0.081 |

## SUPPLEMENTARY MATERIAL

|                |      |       |
|----------------|------|-------|
| PA2685_at      | 3.12 | 0.011 |
| PA2688_pfeA_at | 3.36 | 0.013 |
| PA2689_at      | 7.57 | 0.043 |
| PA2691_at      | 3.18 | 0.027 |
| PA2693_at      | 4.79 | 0.012 |
| PA2694_at      | 5.50 | 0.069 |
| PA2696_at      | 2.79 | 0.029 |
| PA2697_at      | 3.39 | 0.084 |
| PA2700_at      | 2.53 | 0.045 |
| PA2705_at      | 2.08 | 0.053 |
| PA2711_at      | 2.48 | 0.016 |
| PA2712_at      | 4.26 | 0.032 |
| PA2713_at      | 2.73 | 0.013 |
| PA2714_at      | 3.56 | 0.027 |
| PA2716_at      | 6.54 | 0.071 |
| PA2748_at      | 3.10 | 0.086 |
| PA2749_endA_at | 3.51 | 0.057 |
| PA2750_at      | 2.07 | 0.017 |
| PA2752_at      | 2.93 | 0.038 |
| PA2756_at      | 2.04 | 0.043 |
| PA2757_at      | 4.03 | 0.044 |
| PA2768_at      | 5.98 | 0.049 |
| PA2772_at      | 5.74 | 0.068 |
| PA2773_at      | 3.07 | 0.013 |
| PA2774_at      | 4.00 | 0.001 |
| PA2775_at      | 2.60 | 0.002 |
| PA2777_at      | 2.30 | 0.014 |
| PA2784_at      | 2.04 | 0.17  |
| PA2785_at      | 2.19 | 0.051 |
| PA2789_at      | 2.81 | 0.045 |
| PA2791_at      | 6.28 | 0.068 |
| PA2792_at      | 2.95 | 0.156 |
| PA2795_at      | 2.89 | 0.149 |
| PA2802_at      | 2.38 | 0.055 |
| PA2803_at      | 5.78 | 0.093 |
| PA2810_at      | 3.14 | 0.137 |
| PA2819_at      | 5.17 | 0.118 |
| PA2835_at      | 4.69 | 0.031 |
| PA2836_at      | 2.50 | 0.009 |
| PA2837_at      | 4.92 | 0.044 |
| PA2839_at      | 2.36 | 0.06  |
| PA2842_at      | 3.14 | 0.029 |
| PA2844_at      | 4.79 | 0.103 |
| PA2848_at      | 3.36 | 0.068 |
| PA2855_at      | 2.79 | 0.001 |
| PA2859_greB_at | 2.39 | 0.038 |
| PA2863_lipH_at | 2.23 | 0.058 |
| PA2871_at      | 2.93 | 0.039 |
| PA2872_at      | 2.00 | 0.029 |
| PA2874_at      | 2.38 | 0.07  |
| PA2877_at      | 2.85 | 0.076 |

**SUPPLEMENTARY MATERIAL**

|                 |      |       |
|-----------------|------|-------|
| PA2878_at       | 3.51 | 0.04  |
| PA2879_at       | 3.10 | 0.008 |
| PA2880_at       | 3.84 | 0.079 |
| PA2881_at       | 4.29 | 0.064 |
| PA2883_at       | 2.08 | 0.05  |
| PA2886_at       | 2.38 | 0.065 |
| PA2890_at       | 2.79 | 0.067 |
| PA2891_at       | 3.14 | 0.106 |
| PA2892_at       | 2.38 | 0.062 |
| PA2893_at       | 2.58 | 0.085 |
| PA2898_at       | 3.12 | 0.003 |
| PA2910_at       | 3.78 | 0.012 |
| PA2919_at       | 3.92 | 0.012 |
| PA2921_at       | 5.03 | 0.015 |
| PA2922_at       | 4.29 | 0.002 |
| PA2923_hisJ_at  | 3.41 | 0.037 |
| PA2925_hisM_at  | 5.28 | 0.095 |
| PA2926_hisP_at  | 3.01 | 0.004 |
| PA2928_at       | 5.39 | 0.059 |
| PA2929_at       | 3.41 | 0.005 |
| PA2931_at       | 3.03 | 0.086 |
| PA2932_morB_at  | 2.71 | 0.018 |
| PA2933_at       | 3.18 | 0.024 |
| PA2934_at       | 3.48 | 0.009 |
| PA2936_at       | 7.41 | 0.002 |
| PA2938_at       | 2.03 | 0.001 |
| PA2940_at       | 3.84 | 0.002 |
| PA2941_at       | 5.21 | 0.001 |
| PA2942_at       | 3.18 | 0.017 |
| PA2956_at       | 3.94 | 0.036 |
| PA2958_at       | 2.22 | 0.054 |
| PA2961_holB_at  | 2.53 | 0.004 |
| PA2962_tmk_at   | 2.51 | 0.107 |
| PA2964_pabC_at  | 2.08 | 0.144 |
| PA2984_at       | 4.35 | 0.029 |
| PA2985_at       | 2.00 | 0.024 |
| PA2986_at       | 2.46 | 0.128 |
| PA3023_at       | 2.13 | 0.019 |
| PA3024_at       | 3.39 | 0.008 |
| PA3025_at       | 2.91 | 0.002 |
| PA3026_at       | 3.84 | 0.148 |
| PA3028_moeA2_at | 2.16 | 0.033 |
| PA3033_at       | 2.04 | 0.185 |
| PA3035_at       | 2.36 | 0.023 |
| PA3044_at       | 2.75 | 0.033 |
| PA3048_at       | 2.68 | 0.057 |
| PA3056_at       | 2.68 | 0.04  |
| PA3057_at       | 3.94 | 0.003 |
| PA3058_at       | 3.41 | 0.083 |
| PA3060_at       | 3.63 | 0.043 |
| PA3061_at       | 2.43 | 0.046 |

## SUPPLEMENTARY MATERIAL

|                |      |       |
|----------------|------|-------|
| PA3062_at      | 4.29 | 0.092 |
| PA3065_at      | 4.23 | 0.163 |
| PA3069_at      | 2.46 | 0.036 |
| PA3072_at      | 3.56 | 0.017 |
| PA3073_at      | 4.14 | 0.06  |
| PA3074_at      | 2.23 | 0.013 |
| PA3076_at      | 2.23 | 0.007 |
| PA3086_at      | 3.34 | 0.025 |
| PA3093_at      | 2.73 | 0.01  |
| PA3097_xcpX_at | 2.35 | 0.133 |
| PA3099_xcpV_at | 2.08 | 0.064 |
| PA3106_at      | 2.04 | 0.103 |
| PA3109_at      | 2.01 | 0.003 |
| PA3116_at      | 2.03 | 0.001 |
| PA3124_at      | 2.89 | 0.111 |
| PA3125_at      | 4.32 | 0.054 |
| PA3129_at      | 4.79 | 0.081 |
| PA3132_at      | 4.79 | 0.011 |
| PA3133_at      | 4.38 | 0.011 |
| PA3136_at      | 2.85 | 0.04  |
| PA3137_at      | 5.24 | 0.003 |
| PA3142_i_at    | 2.53 | 0.013 |
| PA3174_at      | 2.46 | 0.003 |
| PA3175_at      | 2.79 | 0.009 |
| PA3176_gltS_at | 4.14 | 0.149 |
| PA3178_at      | 3.12 | 0.063 |
| PA3181_at      | 2.91 | 0.001 |
| PA3185_at      | 2.06 | 0.002 |
| PA3191_at      | 3.58 | 0.132 |
| PA3206_at      | 2.20 | 0.051 |
| PA3212_at      | 2.25 | 0.06  |
| PA3218_at      | 3.16 | 0.007 |
| PA3219_at      | 3.86 | 0.008 |
| PA3223_acpD_at | 3.48 | 0.016 |
| PA3230_at      | 2.00 | 0.009 |
| PA3231_at      | 4.08 | 0.147 |
| PA3232_at      | 2.57 | 0.082 |
| PA3237_at      | 6.68 | 0.001 |
| PA3240_at      | 2.31 | 0.009 |
| PA3246_rluA_at | 2.16 | 0.059 |
| PA3248_at      | 2.39 | 0.001 |
| PA3252_at      | 2.33 | 0.131 |
| PA3254_at      | 2.35 | 0.11  |
| PA3258_at      | 3.29 | 0.051 |
| PA3266_capB_at | 4.59 | 0.048 |
| PA3271_at      | 2.17 | 0.078 |
| PA3273_at      | 3.18 | 0.018 |
| PA3275_at      | 4.03 | 0.026 |
| PA3277_at      | 2.66 | 0.015 |
| PA3278_at      | 2.60 | 0.028 |
| PA3279_oprP_at | 4.44 | 0.003 |

## SUPPLEMENTARY MATERIAL

|                 |       |       |
|-----------------|-------|-------|
| PA3280_oprO_at  | 2.71  | 0.035 |
| PA3281_at       | 3.89  | 0.033 |
| PA3283_at       | 4.96  | 0.045 |
| PA3284_at       | 2.89  | 0.019 |
| PA3290_at       | 2.30  | 0.006 |
| PA3291_at       | 2.00  | 0.04  |
| PA3292_at       | 6.92  | 0.08  |
| PA3293_at       | 3.18  | 0.013 |
| PA3294_s_at     | 2.85  | 0.001 |
| PA3296_phoA_at  | 2.60  | 0.018 |
| PA3303_at       | 4.11  | 0.161 |
| PA3305_at       | 3.03  | 0.075 |
| PA3312_at       | 3.41  | 0.014 |
| PA3315_at       | 4.76  | 0.052 |
| PA3316_at       | 2.23  | 0.036 |
| PA3317_at       | 2.60  | 0.114 |
| PA3319_plcN_at  | 3.23  | 0.027 |
| PA3321_at       | 3.66  | 0.1   |
| PA3322_at       | 2.45  | 0.064 |
| PA3327_at       | 3.58  | 0.129 |
| PA3328_at       | 2.41  | 0.154 |
| PA3332_at       | 2.50  | 0.076 |
| PA3333_fabH2_at | 2.33  | 0.127 |
| PA3334_at       | 7.06  | 0.065 |
| PA3335_at       | 5.17  | 0.035 |
| PA3342_at       | 2.79  | 0.021 |
| PA3345_at       | 2.19  | 0.008 |
| PA3346_at       | 2.06  | 0.111 |
| PA3354_at       | 2.13  | 0.037 |
| PA3355_at       | 2.77  | 0.008 |
| PA3361_at       | 12.91 | 0.033 |
| PA3363_amiR_at  | 2.73  | 0.027 |
| PA3366_amiE_at  | 3.56  | 0.022 |
| PA3375_at       | 2.93  | 0.014 |
| PA3377_at       | 4.03  | 0.001 |
| PA3378_at       | 4.23  | 0.025 |
| PA3381_at       | 3.41  | 0.005 |
| PA3384_phnC_at  | 3.71  | 0.007 |
| PA3386_at       | 2.89  | 0.016 |
| PA3389_at       | 2.89  | 0.065 |
| PA3398_at       | 2.53  | 0.007 |
| PA3400_at       | 3.36  | 0.172 |
| PA3401_at       | 3.36  | 0.017 |
| PA3403_at       | 2.85  | 0.014 |
| PA3405_hasE_at  | 4.23  | 0.043 |
| PA3409_at       | 2.85  | 0.036 |
| PA3412_at       | 8.63  | 0.083 |
| PA3421_at       | 2.87  | 0.037 |
| PA3422_at       | 4.08  | 0.047 |
| PA3425_at       | 3.25  | 0.001 |
| PA3429_at       | 3.56  | 0.091 |

## SUPPLEMENTARY MATERIAL

|                |       |       |
|----------------|-------|-------|
| PA3431_at      | 3.05  | 0.055 |
| PA3432_i_at    | 6.36  | 0.009 |
| PA3433_at      | 3.01  | 0.029 |
| PA3436_at      | 3.89  | 0.015 |
| PA3441_at      | 3.58  | 0.098 |
| PA3442_at      | 3.05  | 0.01  |
| PA3443_at      | 4.47  | 0.06  |
| PA3445_at      | 2.48  | 0.087 |
| PA3449_at      | 3.81  | 0.001 |
| PA3470_i_at    | 2.13  | 0.205 |
| PA3473_at      | 4.20  | 0.011 |
| PA3474_at      | 3.73  | 0.122 |
| PA3475_pheC_at | 2.10  | 0     |
| PA3478_rhlB_at | 7.84  | 0.011 |
| PA3479_rhlA_at | 13.64 | 0.044 |
| PA3485_r_at    | 2.45  | 0.022 |
| PA3486_at      | 3.73  | 0.009 |
| PA3492_at      | 3.76  | 0.045 |
| PA3493_at      | 3.46  | 0.044 |
| PA3497_at      | 4.00  | 0.029 |
| PA3499_at      | 3.03  | 0.01  |
| PA3505_at      | 2.77  | 0.011 |
| PA3509_at      | 2.39  | 0.01  |
| PA3511_at      | 2.10  | 0.078 |
| PA3514_at      | 2.73  | 0.075 |
| PA3530_at      | 2.99  | 0.047 |
| PA3532_at      | 3.92  | 0.032 |
| PA3534_at      | 2.39  | 0.18  |
| PA3536_at      | 2.45  | 0.037 |
| PA3540_algD_at | 2.99  | 0.007 |
| PA3542_at      | 2.17  | 0.032 |
| PA3544_algE_at | 3.89  | 0.091 |
| PA3545_algG_at | 3.20  | 0.009 |
| PA3546_algX_at | 2.20  | 0.131 |
| PA3547_algL_at | 3.43  | 0.011 |
| PA3554_at      | 2.41  | 0.013 |
| PA3555_at      | 5.43  | 0.01  |
| PA3556_at      | 3.01  | 0.007 |
| PA3557_at      | 5.58  | 0.033 |
| PA3558_at      | 5.70  | 0.024 |
| PA3560_fruA_at | 3.89  | 0.009 |
| PA3561_fruK_at | 3.07  | 0.012 |
| PA3562_at      | 2.77  | 0.057 |
| PA3564_at      | 4.17  | 0.124 |
| PA3565_at      | 4.00  | 0.046 |
| PA3573_at      | 3.53  | 0.011 |
| PA3578_at      | 2.16  | 0.166 |
| PA3591_at      | 4.08  | 0.01  |
| PA3592_at      | 5.58  | 0.006 |
| PA3594_at      | 3.92  | 0.09  |
| PA3595_at      | 4.14  | 0.002 |

## SUPPLEMENTARY MATERIAL

|                |      |       |
|----------------|------|-------|
| PA3596_at      | 3.18 | 0.043 |
| PA3601_at      | 2.75 | 0.03  |
| PA3605_at      | 2.97 | 0.098 |
| PA3616_at      | 2.50 | 0.143 |
| PA3641_at      | 2.35 | 0.024 |
| PA3642_rnhB_at | 2.97 | 0.031 |
| PA3643_lpxB_at | 2.16 | 0.192 |
| PA3660_at      | 2.79 | 0.127 |
| PA3661_at      | 3.10 | 0.008 |
| PA3663_at      | 2.89 | 0.076 |
| PA3668_at      | 2.23 | 0.124 |
| PA3670_at      | 2.95 | 0.055 |
| PA3676_at      | 4.03 | 0.008 |
| PA3679_at      | 3.53 | 0.043 |
| PA3680_at      | 2.77 | 0.163 |
| PA3682_at      | 2.41 | 0     |
| PA3683_at      | 2.43 | 0.183 |
| PA3689_at      | 3.10 | 0.006 |
| PA3704_at      | 2.51 | 0.099 |
| PA3711_at      | 3.41 | 0.006 |
| PA3714_at      | 2.87 | 0.006 |
| PA3715_at      | 2.51 | 0.014 |
| PA3718_at      | 2.89 | 0.013 |
| PA3724_lasB_at | 2.16 | 0     |
| PA3726_at      | 2.36 | 0.014 |
| PA3741_at      | 2.51 | 0.144 |
| PA3750_at      | 3.53 | 0.048 |
| PA3751_purT_at | 2.46 | 0.095 |
| PA3765_at      | 2.75 | 0.014 |
| PA3772_at      | 3.63 | 0.021 |
| PA3783_at      | 2.93 | 0.01  |
| PA3785_at      | 2.33 | 0.01  |
| PA3791_at      | 2.11 | 0.01  |
| PA3793_at      | 2.51 | 0.084 |
| PA3794_at      | 2.91 | 0.081 |
| PA3810_hscA_at | 2.91 | 0.123 |
| PA3817_at      | 2.73 | 0.176 |
| PA3826_at      | 3.94 | 0.025 |
| PA3827_at      | 2.41 | 0.014 |
| PA3829_at      | 3.10 | 0.128 |
| PA3830_at      | 3.36 | 0.196 |
| PA3835_at      | 3.61 | 0.001 |
| PA3845_at      | 4.63 | 0.059 |
| PA3860_at      | 2.43 | 0.037 |
| PA3862_at      | 2.85 | 0.054 |
| PA3863_at      | 3.10 | 0.044 |
| PA3867_at      | 3.66 | 0.139 |
| PA3868_at      | 3.56 | 0.015 |
| PA3872_narI_at | 3.05 | 0.035 |
| PA3873_narJ_at | 2.75 | 0.016 |
| PA3874_narH_at | 2.75 | 0.028 |

**SUPPLEMENTARY MATERIAL**

|                 |      |       |
|-----------------|------|-------|
| PA3876_narK2_at | 5.21 | 0.108 |
| PA3877_narK1_at | 2.11 | 0.006 |
| PA3886_at       | 2.62 | 0.084 |
| PA3887_nhaP_at  | 2.62 | 0.043 |
| PA3894_at       | 3.53 | 0.112 |
| PA3899_at       | 2.17 | 0.086 |
| PA3902_at       | 2.39 | 0.101 |
| PA3909_at       | 4.06 | 0.003 |
| PA3910_at       | 3.63 | 0.014 |
| PA3915_moaB1_at | 2.66 | 0.155 |
| PA3929_cioB_at  | 2.01 | 0.103 |
| PA3932_at       | 2.66 | 0.044 |
| PA3934_at       | 2.11 | 0.03  |
| PA3935_tauD_at  | 2.85 | 0.005 |
| PA3937_at       | 2.38 | 0.022 |
| PA3938_at       | 2.93 | 0.007 |
| PA3946_at       | 3.61 | 0.04  |
| PA3947_at       | 3.66 | 0.009 |
| PA3949_at       | 2.00 | 0.235 |
| PA3953_at       | 2.51 | 0.111 |
| PA3954_at       | 3.36 | 0.025 |
| PA3961_at       | 2.60 | 0.013 |
| PA3966_at       | 2.28 | 0.023 |
| PA3968_at       | 3.05 | 0.081 |
| PA3971_at       | 2.39 | 0.018 |
| PA3985_at       | 2.73 | 0.014 |
| PA3991_at       | 4.38 | 0.079 |
| PA3994_at       | 4.92 | 0.002 |
| PA4016_at       | 2.51 | 0.046 |
| PA4018_r_at     | 3.97 | 0.114 |
| PA4028_i_at     | 2.48 | 0.135 |
| PA4034_aqpZ_at  | 3.92 | 0.076 |
| PA4037_at       | 3.68 | 0.001 |
| PA4038_at       | 6.28 | 0.038 |
| PA4039_at       | 4.82 | 0.061 |
| PA4041_at       | 2.77 | 0.091 |
| PA4046_at       | 2.30 | 0.04  |
| PA4048_at       | 2.46 | 0.016 |
| PA4050_pgpA_at  | 3.12 | 0.03  |
| PA4062_at       | 2.36 | 0.001 |
| PA4064_at       | 2.28 | 0.051 |
| PA4073_at       | 3.78 | 0.006 |
| PA4075_at       | 2.13 | 0.105 |
| PA4076_at       | 2.79 | 0.015 |
| PA4077_at       | 3.25 | 0.099 |
| PA4078_at       | 2.57 | 0.004 |
| PA4080_at       | 3.71 | 0.04  |
| PA4081_at       | 4.38 | 0.047 |
| PA4082_at       | 3.12 | 0.098 |
| PA4083_at       | 3.41 | 0.01  |
| PA4087_at       | 5.35 | 0.035 |



## SUPPLEMENTARY MATERIAL

|                |      |       |
|----------------|------|-------|
| PA4089_at      | 3.86 | 0.007 |
| PA4095_at      | 3.05 | 0.078 |
| PA4096_at      | 7.31 | 0.014 |
| PA4097_at      | 2.77 | 0.015 |
| PA4098_at      | 3.73 | 0.052 |
| PA4099_at      | 3.48 | 0.028 |
| PA4102_at      | 2.33 | 0.046 |
| PA4103_at      | 4.76 | 0.002 |
| PA4104_at      | 2.79 | 0.006 |
| PA4106_at      | 4.08 | 0.006 |
| PA4109_ampR_at | 2.71 | 0.006 |
| PA4113_at      | 4.56 | 0.009 |
| PA4120_at      | 2.87 | 0.044 |
| PA4121_at      | 2.58 | 0.053 |
| PA4125_hpcD_at | 2.50 | 0.06  |
| PA4126_at      | 4.23 | 0.045 |
| PA4134_i_at    | 2.39 | 0.121 |
| PA4135_at      | 2.89 | 0.069 |
| PA4136_at      | 4.96 | 0.001 |
| PA4137_at      | 4.00 | 0.003 |
| PA4138_tyrS_at | 2.43 | 0.032 |
| PA4141_at      | 5.66 | 0.129 |
| PA4142_at      | 2.43 | 0.029 |
| PA4146_at      | 2.89 | 0.068 |
| PA4149_at      | 2.75 | 0.008 |
| PA4152_at      | 3.84 | 0.042 |
| PA4153_at      | 3.25 | 0.048 |
| PA4154_at      | 2.79 | 0.001 |
| PA4160_fepD_at | 3.41 | 0.014 |
| PA4161_fepG_at | 3.51 | 0.006 |
| PA4165_at      | 3.51 | 0.088 |
| PA4172_at      | 2.35 | 0.081 |
| PA4173_at      | 4.23 | 0.001 |
| PA4174_at      | 2.79 | 0.008 |
| PA4177_at      | 2.99 | 0.001 |
| PA4178_at      | 2.87 | 0.002 |
| PA4181_at      | 2.39 | 0.035 |
| PA4182_at      | 2.04 | 0.022 |
| PA4184_at      | 2.06 | 0.002 |
| PA4186_at      | 3.14 | 0.029 |
| PA4187_at      | 3.51 | 0.011 |
| PA4188_at      | 4.20 | 0.002 |
| PA4191_at      | 4.50 | 0.019 |
| PA4192_at      | 2.58 | 0.02  |
| PA4193_at      | 3.23 | 0.065 |
| PA4196_at      | 2.77 | 0.151 |
| PA4203_at      | 2.64 | 0.023 |
| PA4205_at      | 3.23 | 0.027 |
| PA4206_at      | 3.46 | 0.037 |
| PA4207_at      | 4.29 | 0.061 |
| PA4208_at      | 2.91 | 0.007 |

## SUPPLEMENTARY MATERIAL

|                |      |       |
|----------------|------|-------|
| PA4210_s_at    | 6.32 | 0.095 |
| PA4211_g_at    | 4.20 | 0.072 |
| PA4217_at      | 2.57 | 0.015 |
| PA4220_i_at    | 6.50 | 0.234 |
| PA4222_at      | 4.32 | 0.024 |
| PA4223_at      | 5.24 | 0.013 |
| PA4224_at      | 3.16 | 0.001 |
| PA4226_pchE_at | 2.55 | 0.007 |
| PA4231_pchA_at | 2.83 | 0.079 |
| PA4282_at      | 2.08 | 0.001 |
| PA4283_recD_at | 2.53 | 0.02  |
| PA4284_recB_at | 2.14 | 0.03  |
| PA4289_at      | 4.03 | 0.102 |
| PA4291_at      | 2.07 | 0.107 |
| PA4293_at      | 2.07 | 0.133 |
| PA4301_at      | 2.77 | 0.008 |
| PA4308_at      | 3.34 | 0.086 |
| PA4318_at      | 2.04 | 0.057 |
| PA4319_at      | 2.30 | 0.02  |
| PA4322_at      | 2.01 | 0.035 |
| PA4323_at      | 3.01 | 0.007 |
| PA4331_at      | 2.62 | 0.056 |
| PA4334_at      | 3.29 | 0.139 |
| PA4338_at      | 2.45 | 0.003 |
| PA4341_at      | 3.34 | 0.018 |
| PA4342_at      | 2.75 | 0.031 |
| PA4344_at      | 2.23 | 0.16  |
| PA4346_at      | 3.68 | 0.07  |
| PA4349_at      | 4.06 | 0.01  |
| PA4350_at      | 4.14 | 0.035 |
| PA4351_at      | 6.96 | 0.046 |
| PA4355_at      | 2.13 | 0.015 |
| PA4357_r_at    | 2.83 | 0.043 |
| PA4358_at      | 2.36 | 0.028 |
| PA4364_at      | 3.81 | 0.035 |
| PA4368_at      | 3.01 | 0.083 |
| PA4371_at      | 2.03 | 0.043 |
| PA4377_at      | 2.75 | 0.05  |
| PA4382_at      | 6.02 | 0.143 |
| PA4384_at      | 2.71 | 0.01  |
| PA4388_at      | 2.23 | 0.173 |
| PA4390_at      | 2.91 | 0.116 |
| PA4391_at      | 3.58 | 0.003 |
| PA4392_at      | 2.99 | 0.054 |
| PA4394_at      | 2.33 | 0.064 |
| PA4404_at      | 2.31 | 0.092 |
| PA4419_ftsL_at | 3.23 | 0.049 |
| PA4422_at      | 2.48 | 0.006 |
| PA4437_at      | 3.07 | 0.087 |
| PA4438_at      | 2.07 | 0.128 |
| PA4445_at      | 2.33 | 0     |

## SUPPLEMENTARY MATERIAL

|                |      |       |
|----------------|------|-------|
| PA4452_at      | 2.77 | 0.15  |
| PA4479_mreD_at | 2.38 | 0.137 |
| PA4485_at      | 4.08 | 0.073 |
| PA4487_at      | 2.66 | 0.104 |
| PA4507_at      | 6.06 | 0.062 |
| PA4508_at      | 3.92 | 0.039 |
| PA4510_at      | 3.16 | 0.03  |
| PA4511_at      | 2.22 | 0.045 |
| PA4513_at      | 2.89 | 0.005 |
| PA4514_at      | 2.10 | 0.032 |
| PA4516_at      | 2.27 | 0.033 |
| PA4517_at      | 2.20 | 0.008 |
| PA4518_at      | 3.68 | 0.057 |
| PA4531_at      | 3.25 | 0.008 |
| PA4532_at      | 3.36 | 0.001 |
| PA4533_at      | 3.01 | 0.037 |
| PA4539_at      | 3.53 | 0.009 |
| PA4540_at      | 3.92 | 0.046 |
| PA4541_at      | 2.51 | 0.001 |
| PA4548_at      | 3.48 | 0.001 |
| PA4562_at      | 3.36 | 0.004 |
| PA4570_at      | 3.92 | 0.044 |
| PA4580_at      | 3.66 | 0.039 |
| PA4581_rtcR_at | 2.73 | 0.208 |
| PA4582_at      | 2.33 | 0.014 |
| PA4584_at      | 6.54 | 0.017 |
| PA4585_rtcA_at | 3.61 | 0.003 |
| PA4588_gdhA_at | 2.20 | 0.095 |
| PA4589_at      | 3.76 | 0.112 |
| PA4591_at      | 2.20 | 0.007 |
| PA4592_at      | 2.10 | 0.063 |
| PA4598_mexD_at | 4.35 | 0.001 |
| PA4599_mexC_at | 2.99 | 0.021 |
| PA4601_at      | 2.85 | 0.043 |
| PA4609_radA_at | 3.01 | 0.086 |
| PA4613_katB_at | 3.29 | 0.004 |
| PA4628_lysP_at | 2.39 | 0.004 |
| PA4631_at      | 2.06 | 0.107 |
| PA4634_at      | 2.46 | 0.01  |
| PA4635_at      | 5.13 | 0.04  |
| PA4637_i_at    | 2.81 | 0.036 |
| PA4638_at      | 4.59 | 0.057 |
| PA4641_at      | 3.27 | 0.003 |
| PA4650_at      | 2.23 | 0.177 |
| PA4666_hemA_at | 2.17 | 0.112 |
| PA4669_ipk_at  | 2.04 | 0.136 |
| PA4678_rimI_at | 2.97 | 0.047 |
| PA4680_at      | 2.48 | 0.101 |
| PA4691_at      | 4.41 | 0.053 |
| PA4692_at      | 2.77 | 0.03  |
| PA4705_at      | 2.19 | 0.004 |

## SUPPLEMENTARY MATERIAL

|                 |      |       |
|-----------------|------|-------|
| PA4706_at       | 2.95 | 0.051 |
| PA4707_at       | 3.71 | 0.099 |
| PA4709_at       | 2.06 | 0.127 |
| PA4713_at       | 3.78 | 0.01  |
| PA4714_at       | 2.81 | 0.05  |
| PA4718_at       | 3.56 | 0.002 |
| PA4721_at       | 3.01 | 0.095 |
| PA4764_fur_at   | 2.06 | 0.15  |
| PA4766_at       | 4.08 | 0.006 |
| PA4767_at       | 2.00 | 0.045 |
| PA4774_at       | 2.50 | 0.03  |
| PA4775_at       | 2.57 | 0.064 |
| PA4777_at       | 2.73 | 0.104 |
| PA4783_at       | 3.46 | 0.001 |
| PA4795_at       | 2.31 | 0.015 |
| PA4796_at       | 2.45 | 0.003 |
| PA4805_at       | 3.66 | 0.081 |
| PA4810_fdnI_at  | 2.60 | 0.01  |
| PA4814_fadH2_at | 3.53 | 0.038 |
| PA4815_at       | 3.05 | 0.066 |
| PA4818_at       | 3.34 | 0.027 |
| PA4819_at       | 4.35 | 0.018 |
| PA4820_at       | 5.39 | 0.027 |
| PA4821_at       | 3.12 | 0.003 |
| PA4822_at       | 4.00 | 0.005 |
| PA4823_at       | 4.47 | 0.007 |
| PA4824_at       | 3.36 | 0.015 |
| PA4825_mgtA_at  | 3.73 | 0.07  |
| PA4826_at       | 2.60 | 0.232 |
| PA4830_at       | 6.11 | 0.071 |
| PA4832_at       | 3.73 | 0.002 |
| PA4834_at       | 4.56 | 0.03  |
| PA4835_at       | 5.54 | 0.029 |
| PA4836_at       | 3.34 | 0.021 |
| PA4838_at       | 4.47 | 0.001 |
| PA4845_dipZ_at  | 3.03 | 0.02  |
| PA4849_at       | 2.71 | 0.082 |
| PA4859_at       | 3.18 | 0.015 |
| PA4860_at       | 5.17 | 0.001 |
| PA4861_at       | 3.89 | 0.121 |
| PA4862_at       | 4.03 | 0.004 |
| PA4879_at       | 2.16 | 0.026 |
| PA4884_at       | 3.92 | 0.135 |
| PA4885_irIR_at  | 2.64 | 0.106 |
| PA4886_at       | 7.46 | 0.12  |
| PA4887_at       | 4.50 | 0.093 |
| PA4891_ureE_at  | 2.43 | 0.087 |
| PA4892_ureF_at  | 2.69 | 0.043 |
| PA4895_at       | 6.32 | 0.018 |
| PA4896_at       | 3.34 | 0.006 |
| PA4897_at       | 2.43 | 0.01  |

**SUPPLEMENTARY MATERIAL**

|                |      |       |
|----------------|------|-------|
| PA4898_at      | 3.03 | 0.036 |
| PA4900_at      | 3.92 | 0.001 |
| PA4904_vanA_at | 3.73 | 0.081 |
| PA4908_at      | 2.71 | 0.138 |
| PA4917_at      | 3.71 | 0.08  |
| PA4921_at      | 2.07 | 0.053 |
| PA4926_at      | 2.46 | 0.084 |
| PA4930_alr_at  | 3.20 | 0.022 |
| PA4948_at      | 2.75 | 0.054 |
| PA4950_at      | 3.10 | 0.015 |
| PA4960_at      | 2.19 | 0.004 |
| PA4962_at      | 5.70 | 0.074 |
| PA4963_at      | 2.00 | 0.029 |
| PA4965_at      | 2.51 | 0.076 |
| PA4975_at      | 2.68 | 0.12  |
| PA4977_at      | 2.45 | 0.13  |
| PA4978_at      | 3.48 | 0.003 |
| PA4980_at      | 4.72 | 0.003 |
| PA4981_at      | 3.51 | 0.004 |
| PA4982_at      | 4.59 | 0.045 |
| PA4983_at      | 4.66 | 0     |
| PA4986_at      | 3.81 | 0.002 |
| PA4989_at      | 2.77 | 0.029 |
| PA4990_at      | 2.64 | 0.006 |
| PA4994_at      | 3.68 | 0.008 |
| PA4999_at      | 3.05 | 0.125 |
| PA5010_waaG_at | 2.43 | 0.198 |
| PA5020_at      | 4.14 | 0.029 |
| PA5021_at      | 3.63 | 0.038 |
| PA5030_at      | 3.58 | 0.021 |
| PA5031_at      | 4.03 | 0.011 |
| PA5032_at      | 3.78 | 0.06  |
| PA5034_hemE_at | 2.53 | 0.061 |
| PA5062_at      | 2.10 | 0.069 |
| PA5071_at      | 3.12 | 0.006 |
| PA5081_at      | 2.99 | 0.02  |
| PA5086_at      | 5.94 | 0.123 |
| PA5088_at      | 3.07 | 0.006 |
| PA5089_at      | 2.95 | 0.015 |
| PA5090_at      | 2.46 | 0.022 |
| PA5095_at      | 2.58 | 0.042 |
| PA5097_at      | 3.07 | 0.02  |
| PA5098_hutH_at | 2.36 | 0.012 |
| PA5104_at      | 3.16 | 0     |
| PA5116_at      | 3.94 | 0.108 |
| PA5121_at      | 3.12 | 0.156 |
| PA5127_at      | 2.71 | 0.049 |
| PA5132_at      | 2.19 | 0.059 |
| PA5150_at      | 2.57 | 0.001 |
| PA5151_at      | 3.73 | 0.151 |
| PA5160_at      | 2.50 | 0.046 |

## SUPPLEMENTARY MATERIAL

|                 |      |       |
|-----------------|------|-------|
| PA5175_cysQ_at  | 2.38 | 0.068 |
| PA5183_at       | 2.68 | 0.101 |
| PA5185_at       | 3.61 | 0.044 |
| PA5186_at       | 2.33 | 0.111 |
| PA5188_at       | 3.92 | 0.068 |
| PA5189_at       | 2.87 | 0.055 |
| PA5190_at       | 2.00 | 0.022 |
| PA5195_at       | 2.07 | 0.002 |
| PA5199_envZ_at  | 2.48 | 0.071 |
| PA5207_at       | 3.46 | 0.097 |
| PA5211_at       | 3.39 | 0.007 |
| PA5216_at       | 3.84 | 0.061 |
| PA5217_at       | 2.25 | 0.007 |
| PA5219_at       | 3.12 | 0.021 |
| PA5220_at       | 2.51 | 0.008 |
| PA5228_at       | 2.81 | 0.038 |
| PA5234_at       | 2.39 | 0.007 |
| PA5235_glpT_at  | 2.50 | 0.012 |
| PA5236_at       | 2.81 | 0.064 |
| PA5248_at       | 2.20 | 0.088 |
| PA5249_at       | 2.31 | 0.022 |
| PA5252_at       | 2.60 | 0.075 |
| PA5254_at       | 2.06 | 0.084 |
| PA5258_at       | 2.06 | 0.054 |
| PA5259_hemD_at  | 2.08 | 0.006 |
| PA5262_algZ_at  | 2.73 | 0.052 |
| PA5264_at       | 2.22 | 0.059 |
| PA5266_at       | 3.43 | 0.007 |
| PA5275_at       | 3.58 | 0.002 |
| PA5280_sss_at   | 2.31 | 0.132 |
| PA5282_at       | 3.71 | 0.006 |
| PA5287_amtB_at  | 2.38 | 0.037 |
| PA5302_dadX_at  | 2.95 | 0.032 |
| PA5307_at       | 3.46 | 0.04  |
| PA5310_at       | 4.99 | 0.068 |
| PA5318_at       | 2.19 | 0.001 |
| PA5326_at       | 4.11 | 0.082 |
| PA5327_at       | 2.68 | 0.003 |
| PA5341_at       | 5.28 | 0.001 |
| PA5342_at       | 3.18 | 0     |
| PA5343_at       | 2.03 | 0.009 |
| PA5351_at       | 2.51 | 0.04  |
| PA5352_at       | 2.20 | 0.016 |
| PA5354_glcE_at  | 2.27 | 0.005 |
| PA5367_pstA_at  | 3.12 | 0.035 |
| PA5368_pstC_at  | 2.66 | 0.233 |
| PA5370_at       | 2.50 | 0.106 |
| PA5372_betA_at  | 4.72 | 0.15  |
| PA5375_betT1_at | 3.20 | 0.014 |
| PA5379_sdaB_at  | 3.97 | 0.033 |
| PA5382_at       | 3.23 | 0.073 |

## SUPPLEMENTARY MATERIAL

|                |      |       |
|----------------|------|-------|
| PA5383_at      | 3.23 | 0.153 |
| PA5384_at      | 6.59 | 0.078 |
| PA5387_at      | 3.71 | 0.001 |
| PA5389_at      | 2.33 | 0.023 |
| PA5390_at      | 3.76 | 0.01  |
| PA5391_at      | 3.46 | 0.008 |
| PA5392_at      | 3.41 | 0.131 |
| PA5393_at      | 4.06 | 0.005 |
| PA5395_at      | 2.64 | 0.093 |
| PA5396_at      | 2.11 | 0.111 |
| PA5397_at      | 3.05 | 0.068 |
| PA5399_at      | 4.26 | 0.05  |
| PA5401_at      | 7.52 | 0.011 |
| PA5403_at      | 4.11 | 0.066 |
| PA5404_at      | 4.41 | 0.031 |
| PA5406_at      | 2.45 | 0.047 |
| PA5407_at      | 3.20 | 0.032 |
| PA5408_at      | 2.27 | 0.022 |
| PA5409_at      | 2.71 | 0.022 |
| PA5411_at      | 2.57 | 0.007 |
| PA5412_at      | 7.67 | 0.07  |
| PA5418_soxA_at | 2.46 | 0.066 |
| PA5423_at      | 2.08 | 0.012 |
| PA5428_at      | 2.97 | 0.082 |
| PA5431_at      | 3.16 | 0.028 |
| PA5433_at      | 2.55 | 0.01  |
| PA5443_uvrD_at | 2.10 | 0.118 |
| PA5447_wbpZ_at | 2.08 | 0.093 |
| PA5448_wbpY_at | 2.58 | 0.007 |
| PA5449_wbpX_at | 2.30 | 0.045 |
| PA5457_at      | 2.81 | 0.013 |
| PA5464_at      | 2.99 | 0.001 |
| PA5465_at      | 2.87 | 0.064 |
| PA5466_at      | 2.64 | 0     |
| PA5467_at      | 2.55 | 0.022 |
| PA5468_at      | 3.16 | 0.025 |
| PA5471_at      | 3.84 | 0.002 |
| PA5476_citA_at | 2.89 | 0.045 |
| PA5477_at      | 2.33 | 0.077 |
| PA5478_at      | 3.36 | 0.001 |
| PA5480_at      | 5.10 | 0.018 |
| PA5482_at      | 2.64 | 0.002 |
| PA5501_znuB_at | 2.64 | 0.001 |
| PA5512_at      | 2.81 | 0.192 |
| PA5514_at      | 6.68 | 0.045 |
| PA5517_at      | 3.84 | 0.001 |
| PA5518_at      | 4.00 | 0.003 |
| PA5520_at      | 3.10 | 0.042 |
| PA5522_at      | 2.66 | 0.148 |
| PA5525_at      | 3.12 | 0.042 |
| PA5529_at      | 4.08 | 0.004 |

## SUPPLEMENTARY MATERIAL

|                   |      |       |
|-------------------|------|-------|
| PA5535_at         | 5.43 | 0.091 |
| PA5536_at         | 3.94 | 0.038 |
| PA5537_at         | 3.12 | 0     |
| PA5538_amiA_at    | 2.89 | 0.057 |
| PA5539_at         | 7.78 | 0.074 |
| PA5540_at         | 4.06 | 0.053 |
| PA5541_at         | 3.46 | 0.006 |
| PA5548_at         | 4.59 | 0.001 |
| PA5551_at         | 2.11 | 0.028 |
| PA5566_at         | 5.98 | 0.012 |
| PA5567_at         | 2.75 | 0.02  |
| Pae_M14850cds_at  | 3.36 | 0.338 |
| Pae_tRNA_Cys_i_at | 5.46 | 0.206 |
| Pae_tRNA_Met_s_at | 5.82 | 0.127 |
| Pae_tRNA_Ser_f_at | 3.66 | 0.116 |
| Pae_tRNA_Thr_s_at | 4.06 | 0.058 |



**SUPPLEMENTARY MATERIAL**

**Table S2. Genes that are significantly downregulated in *AbfmR* biofilms compared to *P. aeruginosa* PAO1 biofilms.**

| <b>Significantly Down-regulated Genes</b> | <b>Fold Change</b> | <b>T-test Pvalue</b> |
|-------------------------------------------|--------------------|----------------------|
| ig_5207621_5208463_at                     | -3.92              | 0.001                |
| ig_5563286_5563964_at                     | -2.43              | 0.007                |
| PA0002_dnaN_at                            | -3.56              | 0.047                |
| PA0019_def_at                             | -2.08              | 0.009                |
| PA0020_at                                 | -3.05              | 0.007                |
| PA0036_trpB_at                            | -2.48              | 0.001                |
| PA0049_at                                 | -2.57              | 0.006                |
| PA0055_at                                 | -2.79              | 0.015                |
| PA0083_at                                 | -2.27              | 0.001                |
| PA0105_coxB_at                            | -3.07              | 0.005                |
| PA0106_coxA_at                            | -4.56              | 0                    |
| PA0107_at                                 | -3.43              | 0.001                |
| PA0108_coIII_at                           | -3.29              | 0.017                |
| PA0113_at                                 | -2.43              | 0.011                |
| PA0114_at                                 | -3.78              | 0.016                |
| PA0139_ahpC_at                            | -2.45              | 0.024                |
| PA0141_at                                 | -2.45              | 0.019                |
| PA0176_at                                 | -3.16              | 0.07                 |
| PA0179_at                                 | -3.12              | 0.011                |
| PA0265_gabD_at                            | -2.85              | 0.007                |
| PA0284_at                                 | -2.87              | 0.038                |
| PA0291_oprE_at                            | -3.68              | 0.02                 |
| PA0300_potF2_at                           | -5.54              | 0.007                |
| PA0301_potF3_at                           | -2.33              | 0.015                |
| PA0302_potG_at                            | -2.38              | 0.074                |
| PA0303_potH_at                            | -2.17              | 0.099                |
| PA0316_serA_at                            | -3.76              | 0.002                |
| PA0353_ilvD_at                            | -2.62              | 0.035                |
| PA0359_at                                 | -2.79              | 0.039                |
| PA0388_at                                 | -2.08              | 0.001                |
| PA0395_pilT_at                            | -3.32              | 0.006                |
| PA0399_at                                 | -3.61              | 0.045                |
| PA0401_at                                 | -2.01              | 0.018                |
| PA0407_gshB_at                            | -2.48              | 0.016                |
| PA0408_pilG_at                            | -3.05              | 0.001                |
| PA0409_pilH_at                            | -3.61              | 0.003                |
| PA0411_pilJ_at                            | -2.51              | 0.003                |
| PA0414_at                                 | -2.85              | 0.094                |
| PA0430_metF_at                            | -2.03              | 0.02                 |
| PA0431_at                                 | -3.12              | 0                    |
| PA0432_sahH_at                            | -4.50              | 0.001                |
| PA0482_glcB_at                            | -2.41              | 0.011                |
| PA0505_at                                 | -3.61              | 0.014                |
| PA0516_nirF_at                            | -5.62              | 0.061                |
| PA0517_nirC_at                            | -3.46              | 0.05                 |

## SUPPLEMENTARY MATERIAL

|                 |       |       |
|-----------------|-------|-------|
| PA0518_nirM_at  | -4.44 | 0.001 |
| PA0519_nirS_at  | -8.11 | 0.001 |
| PA0523_norC_at  | -2.79 | 0.047 |
| PA0532_at       | -6.11 | 0.079 |
| PA0537_at       | -2.51 | 0.005 |
| PA0546_metK_at  | -2.68 | 0.017 |
| PA0555_fda_at   | -2.73 | 0.008 |
| PA0572_at       | -2.20 | 0.001 |
| PA0576_rpoD_at  | -2.16 | 0.027 |
| PA0579_rpsU_at  | -3.23 | 0.004 |
| PA0586_at       | -3.89 | 0.004 |
| PA0587_at       | -3.43 | 0     |
| PA0588_at       | -3.16 | 0.001 |
| PA0594_surA_at  | -2.31 | 0.001 |
| PA0595_ostA_at  | -2.73 | 0.001 |
| PA0652_vfr_at   | -2.01 | 0.047 |
| PA0667_at       | -2.06 | 0.006 |
| PA0691_at       | -2.14 | 0.005 |
| PA0730_at       | -4.47 | 0.026 |
| PA0731_at       | -2.10 | 0.004 |
| PA0745_at       | -2.30 | 0.003 |
| PA0758_at       | -2.58 | 0.041 |
| PA0795_prpC_at  | -4.41 | 0.005 |
| PA0796_prpB_at  | -2.75 | 0.025 |
| PA0826_at       | -2.43 | 0.032 |
| PA0833_at       | -2.10 | 0.015 |
| PA0836_at       | -2.55 | 0.001 |
| PA0852_cpbD_at  | -3.41 | 0.103 |
| PA0854_fumC2_at | -2.08 | 0.006 |
| PA0856_at       | -4.32 | 0     |
| PA0857_bolA_at  | -2.03 | 0.064 |
| PA0862_at       | -2.58 | 0.008 |
| PA0865_hpd_at   | -3.61 | 0.011 |
| PA0887_acsA_at  | -2.91 | 0.001 |
| PA0888_aotJ_at  | -2.89 | 0.001 |
| PA0900_at       | -3.05 | 0.002 |
| PA0904_lysC_at  | -2.03 | 0.027 |
| PA0943_at       | -3.48 | 0.002 |
| PA0958_oprD_at  | -4.69 | 0.004 |
| PA0960_at       | -3.07 | 0.012 |
| PA0962_at       | -2.95 | 0.011 |
| PA0969_tolQ_at  | -2.62 | 0     |
| PA0972_tolB_at  | -2.73 | 0.035 |
| PA1008_bcp_at   | -3.36 | 0.001 |
| PA1009_at       | -3.97 | 0.011 |
| PA1010_dapA_at  | -2.66 | 0.004 |
| PA1013_purC_at  | -2.51 | 0.058 |
| PA1048_at       | -3.56 | 0.002 |
| PA1049_pdxH_at  | -2.00 | 0.043 |
| PA1053_at       | -4.29 | 0.091 |
| PA1074_braC_at  | -5.13 | 0.001 |

**SUPPLEMENTARY MATERIAL**

|                 |        |       |
|-----------------|--------|-------|
| PA1077_flgB_at  | -3.32  | 0.025 |
| PA1078_flgC_at  | -2.27  | 0.003 |
| PA1079_flgD_at  | -2.28  | 0.107 |
| PA1080_flgE_at  | -3.46  | 0.018 |
| PA1082_flgG_at  | -3.76  | 0     |
| PA1087_flgL_at  | -2.04  | 0.117 |
| PA1092_fliC_at  | -3.20  | 0.015 |
| PA1093_at       | -4.66  | 0.004 |
| PA1094_fliD_at  | -3.89  | 0.001 |
| PA1096_at       | -2.48  | 0.027 |
| PA1155_nrdB_at  | -2.22  | 0.051 |
| PA1156_nrdA_at  | -5.82  | 0.018 |
| PA1173_napB_at  | -3.58  | 0.014 |
| PA1174_napA_at  | -2.41  | 0.001 |
| PA1176_napF_at  | -2.45  | 0.03  |
| PA1178_oprH_at  | -23.43 | 0.019 |
| PA1179_phoP_at  | -6.15  | 0.002 |
| PA1244_at       | -3.32  | 0.012 |
| PA1288_at       | -3.68  | 0     |
| PA1289_at       | -2.58  | 0     |
| PA1292_at       | -2.50  | 0.007 |
| PA1293_at       | -2.57  | 0.031 |
| PA1333_r_at     | -2.79  | 0.002 |
| PA1337_ansB_at  | -3.71  | 0.001 |
| PA1338_ggt_at   | -9.45  | 0     |
| PA1339_at       | -4.26  | 0.01  |
| PA1340_at       | -5.31  | 0     |
| PA1341_at       | -5.46  | 0.026 |
| PA1342_at       | -5.66  | 0.005 |
| PA1343_at       | -3.25  | 0.052 |
| PA1354_at       | -3.53  | 0     |
| PA1376_aceK_at  | -2.28  | 0.039 |
| PA1431_rsaL_at  | -2.13  | 0.046 |
| PA1440_at       | -2.95  | 0.011 |
| PA1445_fliO_at  | -4.14  | 0.06  |
| PA1456_cheY_at  | -2.22  | 0.018 |
| PA1462_at       | -2.35  | 0.01  |
| PA1493_cysP_at  | -5.35  | 0.017 |
| PA1505_moaA2_at | -2.20  | 0.005 |
| PA1528_zipA_at  | -2.33  | 0.002 |
| PA1544_anr_at   | -2.93  | 0.035 |
| PA1546_hemN_at  | -6.32  | 0.001 |
| PA1551_at       | -2.36  | 0.023 |
| PA1552_at       | -4.17  | 0     |
| PA1553_at       | -4.63  | 0.005 |
| PA1554_at       | -4.79  | 0.002 |
| PA1555_at       | -5.43  | 0.025 |
| PA1556_at       | -6.96  | 0.002 |
| PA1557_at       | -6.41  | 0.001 |
| PA1561_aer_at   | -2.16  | 0.01  |
| PA1562_acnA_at  | -5.39  | 0     |

## SUPPLEMENTARY MATERIAL

|                 |        |       |
|-----------------|--------|-------|
| PA1580_gltA_at  | -9.13  | 0.002 |
| PA1581_sdhC_at  | -3.76  | 0.033 |
| PA1582_sdhD_at  | -5.35  | 0.01  |
| PA1583_sdhA_at  | -5.13  | 0.002 |
| PA1584_sdhB_at  | -3.84  | 0     |
| PA1585_sucA_at  | -5.13  | 0     |
| PA1586_sucB_at  | -4.26  | 0.001 |
| PA1587_lpdG_at  | -3.07  | 0.001 |
| PA1588_sucC_at  | -5.35  | 0     |
| PA1589_sucD_at  | -3.14  | 0     |
| PA1609_fabB_at  | -4.03  | 0.007 |
| PA1610_fabA_at  | -8.22  | 0.004 |
| PA1677_at       | -2.77  | 0.003 |
| PA1708_popB_at  | -2.81  | 0.005 |
| PA1750_at       | -2.35  | 0.004 |
| PA1754_cysB_at  | -5.46  | 0     |
| PA1757_thrH_at  | -2.11  | 0.006 |
| PA1770_ppsA_at  | -2.01  | 0.08  |
| PA1777_oprF_at  | -2.10  | 0.125 |
| PA1787_acnB_at  | -3.14  | 0.003 |
| PA1789_at       | -4.72  | 0.003 |
| PA1793_ppiB_at  | -2.89  | 0.011 |
| PA1800_tig_at   | -3.36  | 0.034 |
| PA1802_clpX_at  | -2.01  | 0.178 |
| PA1837_at       | -2.53  | 0.011 |
| PA1838_cysI_at  | -2.99  | 0.004 |
| PA1847_at       | -3.32  | 0.005 |
| PA1852_at       | -2.58  | 0.022 |
| PA1874_at       | -2.58  | 0.002 |
| PA1881_at       | -2.11  | 0.001 |
| PA1888_at       | -2.33  | 0.017 |
| PA1894_at       | -4.59  | 0.007 |
| PA1895_at       | -10.85 | 0.021 |
| PA1896_at       | -5.13  | 0.024 |
| PA1897_at       | -12.21 | 0.004 |
| PA1927_metE_at  | -3.20  | 0.066 |
| PA1930_at       | -4.26  | 0.001 |
| PA1941_at       | -2.11  | 0.066 |
| PA1970_at       | -2.51  | 0.012 |
| PA1984_s_at     | -3.36  | 0.023 |
| PA1985_pqqA_at  | -2.45  | 0.01  |
| PA2081_at       | -3.81  | 0.007 |
| PA2119_at       | -3.10  | 0     |
| PA2174_at       | -4.47  | 0.032 |
| PA2233_at       | -2.60  | 0.001 |
| PA2234_at       | -2.39  | 0.013 |
| PA2247_bkdA1_at | -2.06  | 0.001 |
| PA2290_gcd_at   | -3.05  | 0.014 |
| PA2303_at       | -2.08  | 0.03  |
| PA2304_at       | -3.05  | 0.022 |
| PA2306_at       | -2.58  | 0.052 |

## SUPPLEMENTARY MATERIAL

|                 |        |       |
|-----------------|--------|-------|
| PA2365_at       | -8.69  | 0.016 |
| PA2366_at       | -6.73  | 0.017 |
| PA2367_at       | -3.29  | 0.067 |
| PA2368_i_at     | -2.55  | 0.013 |
| PA2372_at       | -3.43  | 0.009 |
| PA2393_at       | -3.16  | 0.016 |
| PA2394_at       | -2.48  | 0.019 |
| PA2397_pvdE_at  | -3.56  | 0     |
| PA2398_fpvA_at  | -4.47  | 0     |
| PA2445_gcvP2_at | -2.36  | 0.006 |
| PA2446_gcvH2_at | -5.39  | 0.092 |
| PA2485_at       | -2.71  | 0.017 |
| PA2486_at       | -8.28  | 0.001 |
| PA2491_at       | -6.15  | 0     |
| PA2493_mexE_at  | -25.46 | 0.001 |
| PA2494_mexF_at  | -15.89 | 0.001 |
| PA2495_oprN_at  | -10.78 | 0.014 |
| PA2501_at       | -3.34  | 0.014 |
| PA2604_at       | -2.60  | 0.026 |
| PA2606_at       | -2.11  | 0.101 |
| PA2612_serS_at  | -2.64  | 0.001 |
| PA2616_trxB1_at | -2.30  | 0.003 |
| PA2618_at       | -5.74  | 0.007 |
| PA2619_infA_at  | -2.22  | 0.008 |
| PA2620_clpA_at  | -3.12  | 0.003 |
| PA2621_at       | -2.30  | 0.008 |
| PA2623_icd_at   | -2.51  | 0.038 |
| PA2624_idh_at   | -2.20  | 0.009 |
| PA2629_purB_at  | -3.10  | 0.002 |
| PA2634_at       | -6.19  | 0.001 |
| PA2638_nuoB_at  | -3.07  | 0     |
| PA2639_nuoD_at  | -3.14  | 0     |
| PA2640_nuoE_at  | -2.31  | 0.005 |
| PA2642_nuoG_at  | -2.39  | 0.014 |
| PA2644_nuoI_at  | -2.23  | 0.003 |
| PA2648_nuoM_at  | -2.97  | 0.003 |
| PA2649_nuoN_at  | -2.89  | 0.05  |
| PA2659_at       | -2.22  | 0.163 |
| PA2707_at       | -2.28  | 0.037 |
| PA2709_cysK_at  | -2.43  | 0.004 |
| PA2740_pheS_at  | -2.06  | 0.038 |
| PA2753_at       | -3.05  | 0.047 |
| PA2759_at       | -2.83  | 0.047 |
| PA2760_at       | -4.76  | 0     |
| PA2779_at       | -2.62  | 0.011 |
| PA2782_at       | -5.70  | 0.003 |
| PA2783_at       | -2.85  | 0.001 |
| PA2796_tal_at   | -2.00  | 0.064 |
| PA2800_at       | -3.07  | 0.003 |
| PA2812_at       | -2.97  | 0.012 |
| PA2813_at       | -2.53  | 0.002 |

## SUPPLEMENTARY MATERIAL

|                 |        |       |
|-----------------|--------|-------|
| PA2816_i_at     | -3.10  | 0.002 |
| PA2828_at       | -2.03  | 0.014 |
| PA2850_ohr_at   | -6.77  | 0     |
| PA2862_lipA_at  | -6.96  | 0     |
| PA2939_at       | -4.76  | 0.009 |
| PA2945_at       | -2.30  | 0.038 |
| PA2946_at       | -4.99  | 0.022 |
| PA2951_etfA_at  | -3.20  | 0.004 |
| PA2952_etfB_at  | -3.97  | 0.001 |
| PA2953_at       | -3.27  | 0     |
| PA2967_fabG_at  | -2.31  | 0.042 |
| PA2968_fabD_at  | -2.55  | 0.011 |
| PA2976_rne_at   | -4.72  | 0.024 |
| PA2980_at       | -2.79  | 0.099 |
| PA3001_at       | -4.44  | 0     |
| PA3014_faoA_at  | -3.51  | 0.002 |
| PA3021_at       | -2.25  | 0.006 |
| PA3038_at       | -9.71  | 0     |
| PA3083_pepN_at  | -2.41  | 0.002 |
| PA3104_xcpP_at  | -4.06  | 0.003 |
| PA3108_purF_at  | -2.06  | 0.011 |
| PA3139_at       | -3.48  | 0.044 |
| PA3150_wbpG_at  | -4.47  | 0.103 |
| PA3156_wbpD_at  | -2.01  | 0.104 |
| PA3159_wbpA_at  | -2.53  | 0.011 |
| PA3162_rpsA_at  | -3.05  | 0     |
| PA3170_at       | -2.79  | 0.05  |
| PA3171_ubiG_at  | -2.01  | 0.041 |
| PA3172_at       | -2.64  | 0.059 |
| PA3227_ppiA_at  | -3.01  | 0     |
| PA3229_at       | -11.55 | 0.026 |
| PA3234_at       | -3.71  | 0.004 |
| PA3235_at       | -5.74  | 0.004 |
| PA3250_at       | -2.73  | 0.001 |
| PA3257_prc_at   | -2.38  | 0.017 |
| PA3262_at       | -3.76  | 0.045 |
| PA3286_at       | -2.10  | 0.047 |
| PA3299_fadD1_at | -2.03  | 0.012 |
| PA3313_at       | -3.46  | 0.001 |
| PA3337_rfaD_at  | -2.22  | 0.011 |
| PA3347_at       | -2.77  | 0.031 |
| PA3351_at       | -4.86  | 0.001 |
| PA3352_at       | -3.16  | 0.007 |
| PA3385_at       | -3.81  | 0.001 |
| PA3392_nosZ_at  | -2.81  | 0.036 |
| PA3439_folX_at  | -2.14  | 0.025 |
| PA3440_at       | -5.90  | 0.044 |
| PA3496_at       | -5.06  | 0.117 |
| PA3515_at       | -2.75  | 0.005 |
| PA3516_at       | -9.00  | 0.022 |
| PA3517_at       | -4.47  | 0.06  |

**SUPPLEMENTARY MATERIAL**

|                |        |       |
|----------------|--------|-------|
| PA3518_at      | -8.22  | 0.055 |
| PA3519_at      | -16.56 | 0.013 |
| PA3523_at      | -2.68  | 0.074 |
| PA3525_argG_at | -2.73  | 0.001 |
| PA3527_pyrC_at | -2.35  | 0.015 |
| PA3531_bfrB_at | -4.14  | 0.005 |
| PA3535_at      | -2.77  | 0.036 |
| PA3552_at      | -3.14  | 0.019 |
| PA3584_glpD_at | -2.48  | 0.002 |
| PA3614_at      | -2.20  | 0     |
| PA3622_rpoS_at | -3.34  | 0.004 |
| PA3637_pyrG_at | -2.53  | 0     |
| PA3645_fabZ_at | -2.64  | 0.011 |
| PA3646_lpxD_at | -2.35  | 0.008 |
| PA3655_tsf_at  | -2.81  | 0.121 |
| PA3656_rpsB_at | -5.03  | 0.001 |
| PA3691_at      | -2.10  | 0.007 |
| PA3700_lysS_at | -3.56  | 0.001 |
| PA3701_prfB_at | -2.71  | 0.008 |
| PA3723_at      | -2.03  | 0     |
| PA3745_rpsP_at | -2.50  | 0.037 |
| PA3769_guaA_at | -2.46  | 0.053 |
| PA3770_guaB_at | -2.91  | 0     |
| PA3792_leuA_at | -3.20  | 0.013 |
| PA3806_at      | -2.68  | 0.054 |
| PA3807_ndk_at  | -2.83  | 0.007 |
| PA3814_iscS_at | -2.97  | 0.001 |
| PA3815_at      | -2.20  | 0.084 |
| PA3833_at      | -3.32  | 0.002 |
| PA3834_valS_at | -2.01  | 0.015 |
| PA3836_at      | -3.53  | 0.01  |
| PA3842_at      | -2.25  | 0.004 |
| PA3857_at      | -3.25  | 0.013 |
| PA3858_at      | -2.91  | 0.004 |
| PA3919_at      | -6.54  | 0     |
| PA3920_at      | -4.17  | 0.004 |
| PA3922_at      | -4.76  | 0.073 |
| PA3923_at      | -7.26  | 0.001 |
| PA3962_at      | -3.48  | 0.006 |
| PA3976_thiE_at | -2.95  | 0.003 |
| PA3977_hemL_at | -2.66  | 0     |
| PA3981_at      | -2.13  | 0.007 |
| PA3988_at      | -3.68  | 0.008 |
| PA3999_dacC_at | -2.99  | 0.001 |
| PA4015_at      | -3.23  | 0.001 |
| PA4024_eutB_at | -2.93  | 0.042 |
| PA4026_at      | -2.01  | 0.006 |
| PA4033_at      | -2.66  | 0.104 |
| PA4053_ribE_at | -2.46  | 0.03  |
| PA4054_ribB_at | -4.99  | 0.001 |
| PA4055_ribC_at | -3.71  | 0.03  |

**SUPPLEMENTARY MATERIAL**

|                 |       |       |
|-----------------|-------|-------|
| PA4063_at       | -2.16 | 0.075 |
| PA4067_oprG_at  | -2.30 | 0.028 |
| PA4090_at       | -2.08 | 0.022 |
| PA4139_at       | -3.48 | 0.12  |
| PA4175_at       | -2.73 | 0     |
| PA4232_ssb_at   | -3.68 | 0.003 |
| PA4235_bfrA_at  | -4.14 | 0.006 |
| PA4236_katA_at  | -4.56 | 0.008 |
| PA4238_rpoA_at  | -5.90 | 0.001 |
| PA4239_rpsD_at  | -5.62 | 0.002 |
| PA4240_rpsK_at  | -6.96 | 0     |
| PA4241_rpsM_at  | -9.38 | 0.01  |
| PA4242_rpmJ_at  | -9.19 | 0.021 |
| PA4243_secY_at  | -4.00 | 0.007 |
| PA4244_rplO_at  | -3.84 | 0.012 |
| PA4245_rpmD_at  | -3.73 | 0.032 |
| PA4246_rpsE_at  | -3.73 | 0.029 |
| PA4247_rplR_at  | -5.50 | 0.004 |
| PA4248_rplF_at  | -4.89 | 0.002 |
| PA4249_rpsH_at  | -4.56 | 0.011 |
| PA4251_rplE_at  | -2.95 | 0.013 |
| PA4252_rplX_at  | -8.00 | 0.008 |
| PA4253_rplN_at  | -5.74 | 0.006 |
| PA4254_rpsQ_at  | -5.98 | 0.006 |
| PA4255_rpmC_at  | -5.06 | 0.001 |
| PA4256_rplP_at  | -5.03 | 0.01  |
| PA4257_rpsC_at  | -4.44 | 0     |
| PA4258_rplV_at  | -6.02 | 0.005 |
| PA4259_rpsS_at  | -5.13 | 0.01  |
| PA4260_rplB_at  | -4.72 | 0.026 |
| PA4261_rplW_at  | -4.53 | 0.008 |
| PA4262_rplD_at  | -5.82 | 0     |
| PA4263_rplC_at  | -4.20 | 0     |
| PA4264_rpsJ_at  | -3.25 | 0.008 |
| PA4266_fusA1_at | -6.92 | 0     |
| PA4267_rpsG_at  | -7.11 | 0.001 |
| PA4268_rpsL_at  | -9.13 | 0.001 |
| PA4269_rpoC_at  | -2.45 | 0.004 |
| PA4270_rpoB_at  | -3.63 | 0.004 |
| PA4271_rplL_at  | -3.41 | 0.011 |
| PA4272_rplJ_at  | -5.10 | 0.026 |
| PA4273_rplA_at  | -5.21 | 0.006 |
| PA4274_rplK_at  | -5.58 | 0.002 |
| PA4296_at       | -3.10 | 0.008 |
| PA4309_pctA_at  | -2.83 | 0.006 |
| PA4310_pctB_at  | -3.12 | 0.005 |
| PA4315_mvAT_at  | -2.53 | 0.04  |
| PA4328_at       | -3.73 | 0.01  |
| PA4329_pykA_at  | -2.93 | 0.025 |
| PA4333_at       | -3.43 | 0.02  |
| PA4356_xenB_at  | -2.11 | 0.008 |



## SUPPLEMENTARY MATERIAL

|                 |       |       |
|-----------------|-------|-------|
| PA4366_sodB_at  | -2.46 | 0.024 |
| PA4370_at       | -5.17 | 0.001 |
| PA4385_groEL_at | -2.91 | 0.028 |
| PA4386_groES_at | -3.46 | 0.003 |
| PA4395_at       | -2.79 | 0.068 |
| PA4403_secA_at  | -2.69 | 0.007 |
| PA4407_ftsZ_at  | -4.11 | 0.005 |
| PA4423_at       | -2.89 | 0.004 |
| PA4424_at       | -2.45 | 0.006 |
| PA4425_at       | -4.79 | 0.003 |
| PA4426_at       | -2.04 | 0.001 |
| PA4430_at       | -2.53 | 0.094 |
| PA4431_at       | -4.29 | 0.005 |
| PA4433_rplM_at  | -4.03 | 0.086 |
| PA4441_at       | -3.53 | 0.003 |
| PA4442_cysN_at  | -2.14 | 0.046 |
| PA4450_murA_at  | -2.25 | 0.023 |
| PA4459_at       | -2.64 | 0.024 |
| PA4460_at       | -3.73 | 0     |
| PA4461_at       | -3.43 | 0.003 |
| PA4462_rpoN_at  | -2.38 | 0.041 |
| PA4463_at       | -4.29 | 0.002 |
| PA4464_ptsN_at  | -2.97 | 0.014 |
| PA4465_at       | -2.28 | 0.021 |
| PA4469_at       | -3.18 | 0     |
| PA4471_at       | -2.27 | 0.052 |
| PA4483_gatA_at  | -2.53 | 0.019 |
| PA4496_at       | -5.86 | 0.011 |
| PA4497_at       | -3.43 | 0.018 |
| PA4526_pilB_at  | -2.14 | 0.029 |
| PA4527_pilC_at  | -2.36 | 0.041 |
| PA4550_fimU_at  | -2.91 | 0.012 |
| PA4552_pilW_at  | -2.35 | 0     |
| PA4554_pilY1_at | -2.36 | 0.008 |
| PA4555_pilY2_at | -3.34 | 0.028 |
| PA4556_pilE_at  | -2.41 | 0.002 |
| PA4568_rplU_at  | -3.27 | 0.031 |
| PA4578_at       | -2.66 | 0.016 |
| PA4587_ccpR_at  | -4.11 | 0.002 |
| PA4602_glyA3_at | -5.10 | 0.001 |
| PA4606_at       | -2.48 | 0.017 |
| PA4611_at       | -2.14 | 0.061 |
| PA4623_r_at     | -2.43 | 0.053 |
| PA4646_upp_at   | -2.16 | 0.045 |
| PA4648_at       | -3.94 | 0     |
| PA4671_at       | -3.16 | 0.101 |
| PA4672_at       | -2.14 | 0.073 |
| PA4694_ilvC_at  | -2.22 | 0.073 |
| PA4695_ilvH_at  | -2.06 | 0.039 |
| PA4696_ilvI_at  | -2.36 | 0.05  |
| PA4701_at       | -2.06 | 0.003 |

## SUPPLEMENTARY MATERIAL

|                 |       |       |
|-----------------|-------|-------|
| PA4703_at       | -3.92 | 0.003 |
| PA4726_at       | -3.14 | 0.002 |
| PA4731_panD_at  | -2.08 | 0.003 |
| PA4733_acsB_at  | -2.10 | 0.082 |
| PA4740_pnp_at   | -4.76 | 0.016 |
| PA4741_rpsO_at  | -3.76 | 0.014 |
| PA4745_nusA_at  | -2.50 | 0.002 |
| PA4751_ftsH_at  | -2.19 | 0.007 |
| PA4757_at       | -2.23 | 0.037 |
| PA4758_carA_at  | -2.39 | 0.024 |
| PA4761_dnaK_at  | -2.31 | 0.042 |
| PA4762_grpE_at  | -2.10 | 0.034 |
| PA4793_at       | -3.27 | 0.036 |
| PA4798_at       | -2.23 | 0.005 |
| PA4842_at       | -2.51 | 0.011 |
| PA4846_aroQ1_at | -3.03 | 0.003 |
| PA4847_accB_at  | -3.25 | 0.004 |
| PA4848_accC_at  | -3.43 | 0.001 |
| PA4853_fis_at   | -2.81 | 0.019 |
| PA4878_at       | -2.60 | 0.005 |
| PA4880_at       | -4.59 | 0.004 |
| PA4881_at       | -6.50 | 0.055 |
| PA4907_at       | -4.00 | 0.003 |
| PA4911_at       | -2.41 | 0.016 |
| PA4912_at       | -2.50 | 0.004 |
| PA4913_at       | -4.08 | 0.004 |
| PA4919_pncB1_at | -4.32 | 0.011 |
| PA4920_nadE_at  | -4.82 | 0.042 |
| PA4922_azt_at   | -3.16 | 0.02  |
| PA4935_rpsF_at  | -3.20 | 0.025 |
| PA4938_purA_at  | -2.06 | 0     |
| PA4941_hflC_at  | -2.04 | 0.037 |
| PA4944_at       | -2.41 | 0.253 |
| PA4971_at       | -2.23 | 0.037 |
| PA4974_at       | -2.85 | 0.004 |
| PA5013_ilvE_at  | -3.39 | 0.01  |
| PA5015_aceE_at  | -5.24 | 0.007 |
| PA5016_aceF_at  | -2.48 | 0.005 |
| PA5018_msrA_at  | -2.20 | 0.052 |
| PA5040_pilQ_at  | -3.07 | 0.015 |
| PA5041_pilP_at  | -2.27 | 0.028 |
| PA5043_pilN_at  | -2.53 | 0.05  |
| PA5044_pilM_at  | -2.06 | 0.021 |
| PA5046_at       | -3.71 | 0.004 |
| PA5051_argS_at  | -3.07 | 0.002 |
| PA5053_hslV_at  | -2.17 | 0.048 |
| PA5054_hslU_at  | -2.48 | 0.056 |
| PA5056_phaC1_at | -3.53 | 0.021 |
| PA5063_ubiE_at  | -2.43 | 0     |
| PA5066_hisI_at  | -2.45 | 0.066 |
| PA5067_hisE_at  | -2.68 | 0.039 |

**SUPPLEMENTARY MATERIAL**

|                  |       |       |
|------------------|-------|-------|
| PA5068_tatA_at   | -2.43 | 0.003 |
| PA5069_tatB_at   | -2.77 | 0.008 |
| PA5076_at        | -2.58 | 0.049 |
| PA5078_at        | -2.41 | 0.001 |
| PA5110_fbp_at    | -2.51 | 0.001 |
| PA5112_estA_at   | -3.36 | 0.004 |
| PA5119_glnA_at   | -3.34 | 0     |
| PA5128_secB_at   | -3.14 | 0.028 |
| PA5129_grx_at    | -3.12 | 0.001 |
| PA5134_at        | -2.31 | 0     |
| PA5148_at        | -4.99 | 0.066 |
| PA5152_at        | -3.03 | 0.034 |
| PA5153_at        | -3.63 | 0.086 |
| PA5167_at        | -3.05 | 0.015 |
| PA5170_arcD_at   | -5.39 | 0.01  |
| PA5171_arcA_at   | -3.41 | 0.024 |
| PA5172_arcB_at   | -3.73 | 0.024 |
| PA5173_arcC_at   | -4.26 | 0     |
| PA5192_pckA_at   | -2.45 | 0.003 |
| PA5210_at        | -2.08 | 0.018 |
| PA5214_gcvH1_at  | -3.16 | 0.034 |
| PA5242_ppk_at    | -2.36 | 0.03  |
| PA5243_hemB_at   | -2.20 | 0.003 |
| PA5245_at        | -2.30 | 0.022 |
| PA5253_algP_at   | -3.78 | 0.009 |
| PA5274_rnk_at    | -2.69 | 0.017 |
| PA5276_lppL_i_at | -2.17 | 0.002 |
| PA5304_dadA_at   | -2.57 | 0.002 |
| PA5306_at        | -2.00 | 0.002 |
| PA5312_at        | -2.41 | 0.027 |
| PA5316_rpmB_at   | -2.13 | 0.061 |
| PA5320_dfp_at    | -2.07 | 0.006 |
| PA5322_algC_at   | -2.75 | 0.017 |
| PA5344_at        | -2.14 | 0.047 |
| PA5348_at        | -4.96 | 0.001 |
| PA5380_at        | -2.99 | 0.001 |
| PA5427_adhA_at   | -2.60 | 0.013 |
| PA5429_aspA_at   | -5.06 | 0.011 |
| PA5436_at        | -3.07 | 0.025 |
| PA5438_at        | -2.91 | 0     |
| PA5446_i_at      | -2.43 | 0.071 |
| PA5461_at        | -3.07 | 0.004 |
| PA5475_at        | -2.35 | 0.019 |
| PA5490_cc4_at    | -3.84 | 0.001 |
| PA5494_at        | -2.41 | 0.018 |
| PA5497_at        | -2.43 | 0.02  |
| PA5505_at        | -2.97 | 0.006 |
| PA5546_at        | -2.08 | 0.015 |
| PA5554_atpD_at   | -2.45 | 0.081 |
| PA5555_atpG_at   | -4.00 | 0.007 |
| PA5556_atpA_at   | -2.85 | 0.001 |

## SUPPLEMENTARY MATERIAL

|                   |       |       |
|-------------------|-------|-------|
| PA5557_atpH_at    | -3.36 | 0.003 |
| PA5569_rnpA_at    | -2.46 | 0.013 |
| PA5570_rpmH_at    | -2.97 | 0.006 |
| Pae_tRNA_Gly_s_at | -2.83 | 0.031 |

**SUPPLEMENTARY MATERIAL**

**Table S3. Strains and plasmids**

| Strains/Plasmids                                                      | Relevant genotype or description                                                                                                                                                                                        | Source                                              |
|-----------------------------------------------------------------------|-------------------------------------------------------------------------------------------------------------------------------------------------------------------------------------------------------------------------|-----------------------------------------------------|
| <b>Strains</b>                                                        |                                                                                                                                                                                                                         |                                                     |
| <i>Escherichia coli</i>                                               |                                                                                                                                                                                                                         |                                                     |
| DH5 $\alpha$                                                          | <i>F<sup>-</sup> <math>\phi</math>80lacZ<math>\Delta</math>M15 <math>\Delta</math>(lacZYA-argF)U169 recA1 endA1 hsdR17(<i>rk<sup>-</sup></i>, <i>mk<sup>+</sup></i>)<br/><i>phoA supE44 thi-1 gyrA96 relA1 tonA</i></i> | Invitrogen Corp.                                    |
| <i>P. aeruginosa</i>                                                  |                                                                                                                                                                                                                         |                                                     |
| PAO1                                                                  | Wild type                                                                                                                                                                                                               | B.H. Holloway (Petrova & Sauer, 2009)               |
| $\Delta$ <i>bfmR</i>                                                  | PAO1; <i>PA4101::ISlacZ</i> ; Tet <sup>R</sup><br><i>\Delta</i> <i>bfmR</i> with a 63-bp insertion in <i>PA4101</i> , derived from <i>\Delta</i> <i>bfmR</i> using the <i>cre</i> -mediated recombination               | This study                                          |
| $\Delta$ <i>bfmR</i> -Tet <sup>S</sup><br>PAO1- <i>gfp</i>            | PAO1 containing pUC18T-mini-Tn7T-Gm- <i>gfpmut3a</i> ; Gm <sup>R</sup>                                                                                                                                                  | This study (Petrova & Sauer, 2009)                  |
| PAO1/pJN105                                                           | PAO1 bearing empty pJN105 vector; Gm <sup>R</sup>                                                                                                                                                                       | (Petrova & Sauer, 2009)                             |
| $\Delta$ <i>bfmR</i> /pJN- <i>bfmR</i>                                | Complementation of <i>\Delta</i> <i>bfmR</i> ; Tet <sup>R</sup> ; Gm <sup>R</sup> , arabinose-inducible                                                                                                                 | (Petrova & Sauer, 2009)                             |
| PAO1/pJN- <i>bfmR</i>                                                 | Arabinose-inducible expression of <i>bfmR</i> -V5/6XHis in PAO1; Gm <sup>R</sup>                                                                                                                                        | (Petrova & Sauer, 2009)                             |
| PAO1/pJN- <i>phdA</i>                                                 | Arabinose-inducible expression of <i>phdA</i> in PAO1; Gm <sup>R</sup>                                                                                                                                                  | This study                                          |
| $\Delta$ <i>bfmR</i> /pJN- <i>phdA</i>                                | Arabinose-inducible expression of <i>phdA</i> in <i>\Delta</i> <i>bfmR</i> ; Gm <sup>R</sup>                                                                                                                            | This study                                          |
| PAO1/ <i>P<sub>bfmR</sub>-lacZ</i>                                    | LacZ reporter strain                                                                                                                                                                                                    | This study                                          |
| PAO1/ <i>P<sub>bfmR</sub>-gfp</i>                                     | GFP reporter strain                                                                                                                                                                                                     | This study                                          |
| $\Delta$ <i>bfmR</i> - Tet <sup>S</sup> / <i>P<sub>bfmR</sub>-gfp</i> | GFP reporter strain                                                                                                                                                                                                     | This study                                          |
| PA14                                                                  | Wild type                                                                                                                                                                                                               | (Liberati <i>et al.</i> , 2006)                     |
| $\Delta$ <i>phdA</i>                                                  | PA14 <i>PA0691::MAR2xT7</i> ; Gm <sup>R</sup>                                                                                                                                                                           |                                                     |
| <b>Plasmids</b>                                                       |                                                                                                                                                                                                                         |                                                     |
| pRK2013                                                               | Helper plasmid for triparental mating; <i>mob</i> ; <i>tra</i> ; Km <sup>R</sup>                                                                                                                                        | (Figurski & Helinski, 1979)                         |
| pJN105                                                                | Arabinose-inducible gene expression vector; pBRR-1 MCS; <i>araC</i> -P <sub>BAD</sub> ; Gm <sup>R</sup>                                                                                                                 | (Newman & Fuqua, 1999)                              |
| mini-CTX- <i>lacZ</i>                                                 | Integration vector for single-copy, chromosomal <i>lacZ</i> fusions; $\Omega$ - <i>FRT-attP</i> -MCS, <i>ori</i> , <i>int</i> , and <i>oriT</i> ; Tet <sup>R</sup>                                                      | (Becher & Schweizer, 2000)                          |
| mini-CTX- <i>gfp</i>                                                  | Integration vector for single-copy, chromosomal <i>gfp</i> fusions; $\Omega$ - <i>FRT-attP</i> -MCS, <i>ori</i> , <i>int</i> , and <i>oriT</i> ; Tet <sup>R</sup>                                                       | (Hoang <i>et al.</i> , 2000)                        |
| pCre1                                                                 | Vector bearing the <i>cre</i> recombinase system; Amp <sup>R</sup>                                                                                                                                                      | (Bailey & Manoil, 2002, Banin <i>et al.</i> , 2005) |
| pJN- <i>bfmR</i>                                                      | <i>bfmR</i> -V5/6XHis cloned into pJN105 at <i>EcoRI/SpeI</i>                                                                                                                                                           | (Petrova & Sauer, 2009)                             |
| pJN- <i>phdA</i>                                                      | <i>phdA</i> cloned into pJN105 at <i>EcoRI/SacI</i>                                                                                                                                                                     | This study                                          |
| pCTX-P <sub><i>bfmR</i></sub> - <i>lacZ</i>                           | -500bp relative to translational start site of <i>bfmR</i> cloned into mini-CTX- <i>lacZ</i> ; Tet <sup>R</sup>                                                                                                         | This study                                          |

## SUPPLEMENTARY MATERIAL

pCTX-P<sub>b<sub>f</sub>mR</sub>-*gfp*      -500bp relative to translational start site of *b<sub>f</sub>mR* cloned into mini-CTX-*gfp*; Tet<sup>R</sup>      This study

## SUPPLEMENTARY MATERIAL

**Table S4. Oligonucleotides**

| Oligonucleotide                  | Sequence                            |
|----------------------------------|-------------------------------------|
| <i><b>RT-PCR/ PCR</b></i>        |                                     |
| mreBf                            | CTGTCGATCGACCTGGG                   |
| mreBr                            | CAGCCATCGGCTCTTCG                   |
| rhlAf                            | GCGCGATGGCGACCAC                    |
| rhlAr                            | CACCACCGAGCTGCGG                    |
| lasBf                            | GCCGCCGACCTGATCG                    |
| lasBr                            | CAGCACCTGCTCGGCG                    |
| PA0691f                          | GCAGGAACTTGATCAGCG                  |
| PA0691r                          | GGACACTTCCTTGAGCGC                  |
| pqsAf                            | CATTCTCTCCCAGGCCAG                  |
| pqsAr                            | CAGTCGGCAGCGATATCG                  |
| pqsLf                            | GTGGTGGTAGTGGAACAGG                 |
| pqsLr                            | GCGTCGACGCTGGAATAG                  |
| coaBf                            | CAATGAAGCAACGCATCGC                 |
| coaBr                            | CGATGTAGCCGCCAATGG                  |
| PA0636f                          | GGCAGGATCAACGATCAG                  |
| PA0636r                          | CAGGCTTCTTGGCCTGAC                  |
| <i><b>Cloning*</b></i>           |                                     |
| PbfmR                            | GCGCGCgaattcTGCCTGGCTCCCGTGG        |
| PbfmF1                           | GCGCGCaagcttCGTCAGCCGCTGTATCG       |
| PbfmF2                           | GCGCGCaagcttGTTCTGGGTCGCCAC         |
| PbfmF3                           | GCGCGCaagcttGCTGATCACCGGCAATAC      |
| PA0691_EcoRI_for                 | GCGCGCgaattcATGGAAAGTTACTCGAAAGTCGG |
| PA0691_SacI_rev                  | GCGCGCgagctcCTAGATATTCAGCCGTCGC     |
| <i><b>DNA binding assays</b></i> |                                     |
| PphdA_for**                      | CATGACAAAAGTTCGGTGGTG               |
| PphdA_rev                        | CAATACTCACCGTCCTTCGC                |

\* Restriction sites are indicated by nucleotides in lower case

\*\* Primer used as biotinylated form for DNA binding assays for probe amplification, and non-biotinylated for the generation of specific competitor DNA

## SUPPLEMENTARY MATERIAL

### SUPPLEMENTARY FIGURES

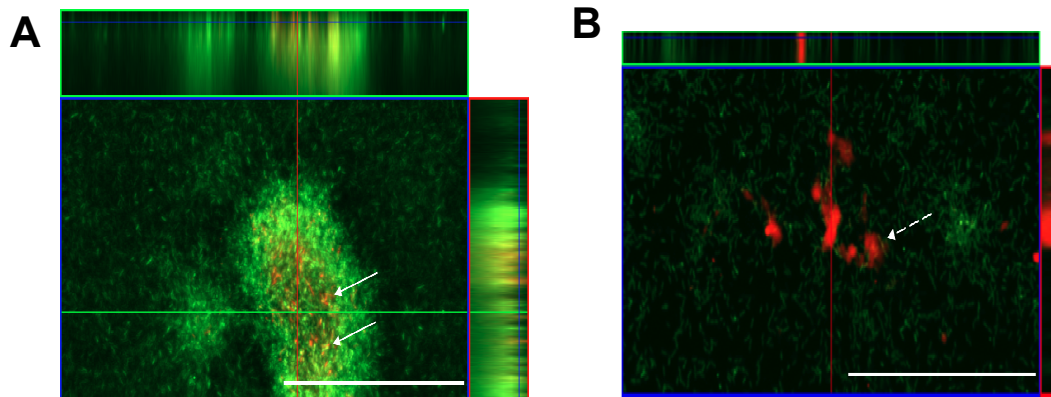

**Figure S1. Inactivation of *bfmR* coincides with increased cell death and release of DNA (A-B).** 6-day old  $\Delta bfmR$  biofilms were stained with LIVE/DEAD BacLight viability kit prior image acquisition by confocal microscopy. Arrows indicate material stained with propidium iodide not associated with cells. White bar = 100  $\mu\text{m}$ .



SUPPLEMENTARY MATERIAL

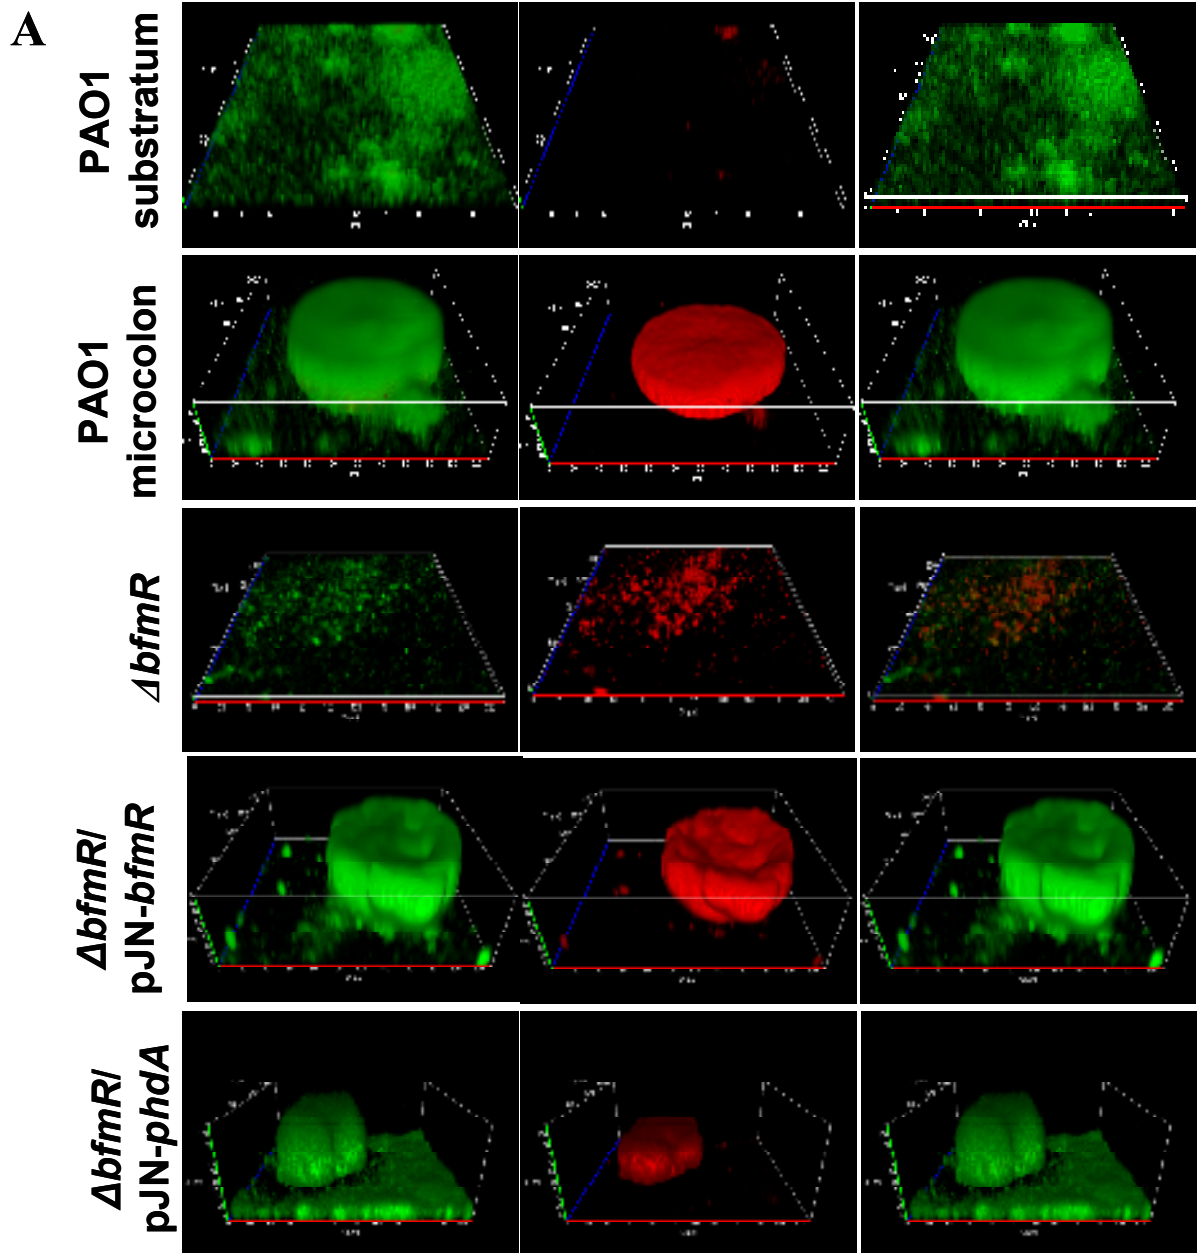

SUPPLEMENTARY MATERIAL

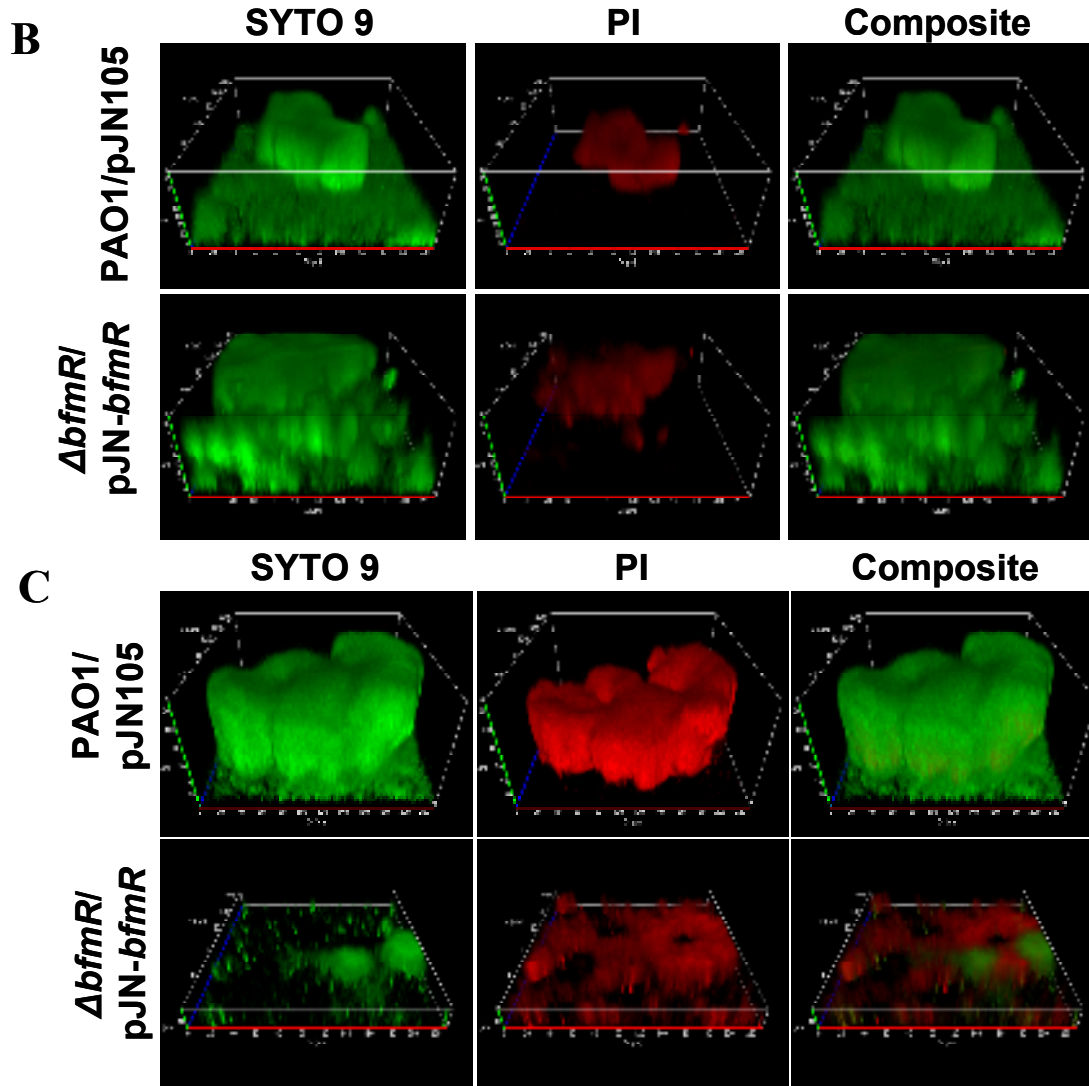

SUPPLEMENTARY MATERIAL

D

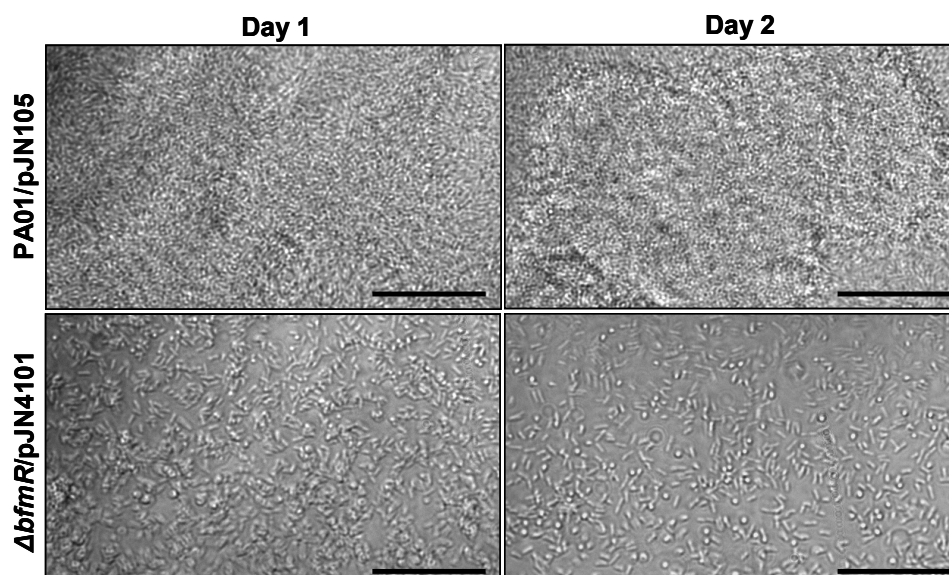

**Figure S2. Detection of increased cell death as indicated by propidium iodide staining upon inactivation of *bfmR* in biofilms.** (A) PAO1,  $\Delta bfmR$ , and complemented  $\Delta bfmR$  biofilms, grown under continuous flow conditions for 144 hr, were stained with SYTO 9 and propidium iodide (PI) using the LIVE/DEAD *BacLight* viability kit. CSLM-acquired images were analyzed by splitting the green (SYTO 9) and red (PI) channels. (B) Confocal images of wild type PAO1 bearing the empty pJN105 vector and complemented  $\Delta bfmR$  bearing pJN-*bfmR* were grown in the presence of arabinose for 144 hr. (C) Wild type PAO1 bearing the empty pJN105 vector and complemented  $\Delta bfmR$  bearing pJN-*bfmR* were grown in the presence of arabinose for 144 hr, at which point, arabinose was removed in order to inactivate transcription from the pBAD promoter. Biofilms were allowed to grow for an additional 72 hrs before confocal images were acquired. (D) Brightfield images of *P. aeruginosa* PAO1/pJN105 and  $\Delta bfmR$ /pJN-*bfmR* biofilms acquired 24 and 48 hrs post arabinose removal. Black bar = 25  $\mu$ m.

SUPPLEMENTARY MATERIAL

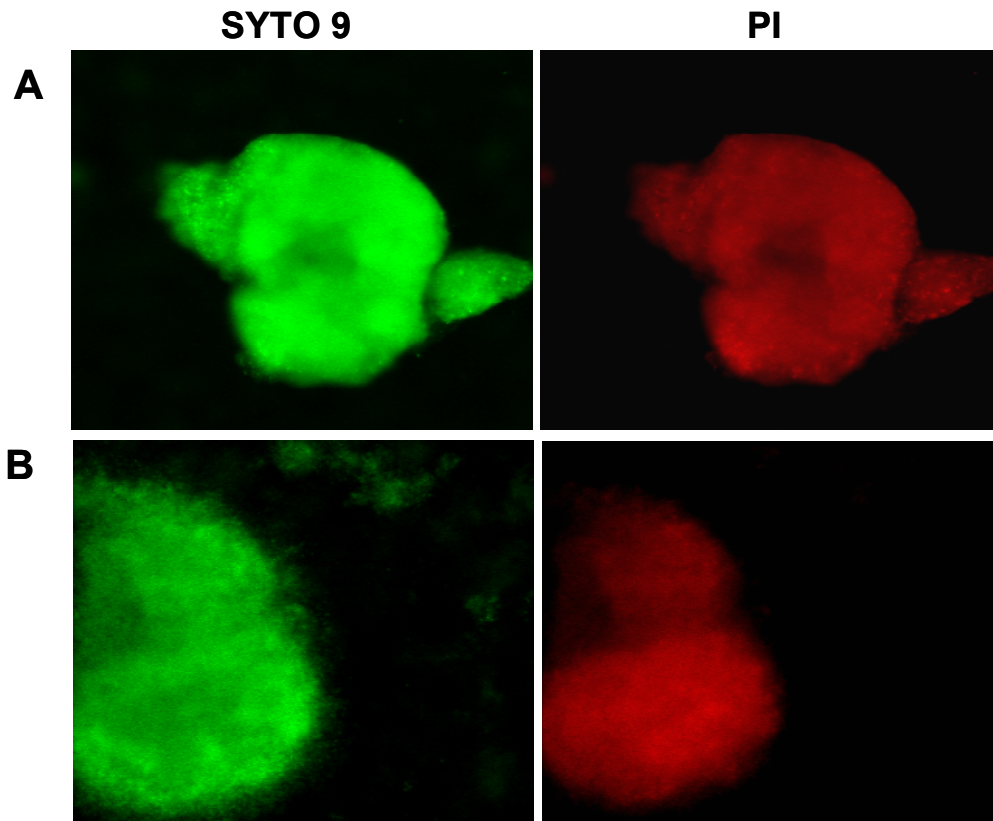

**Figure S3. Overexpression of *bfmR* results in reduction of regions stainable with propidium iodide.** PAO1 (A) and PAO1/pJN-*bfmR* (B) biofilms were stained with SYTO 9 and propidium iodide (PI) using the LIVE/DEAD *BacLight* viability kit. Confocal images were acquired by splitting the green (SYTO 9) and red (PI) channels.

SUPPLEMENTARY MATERIAL

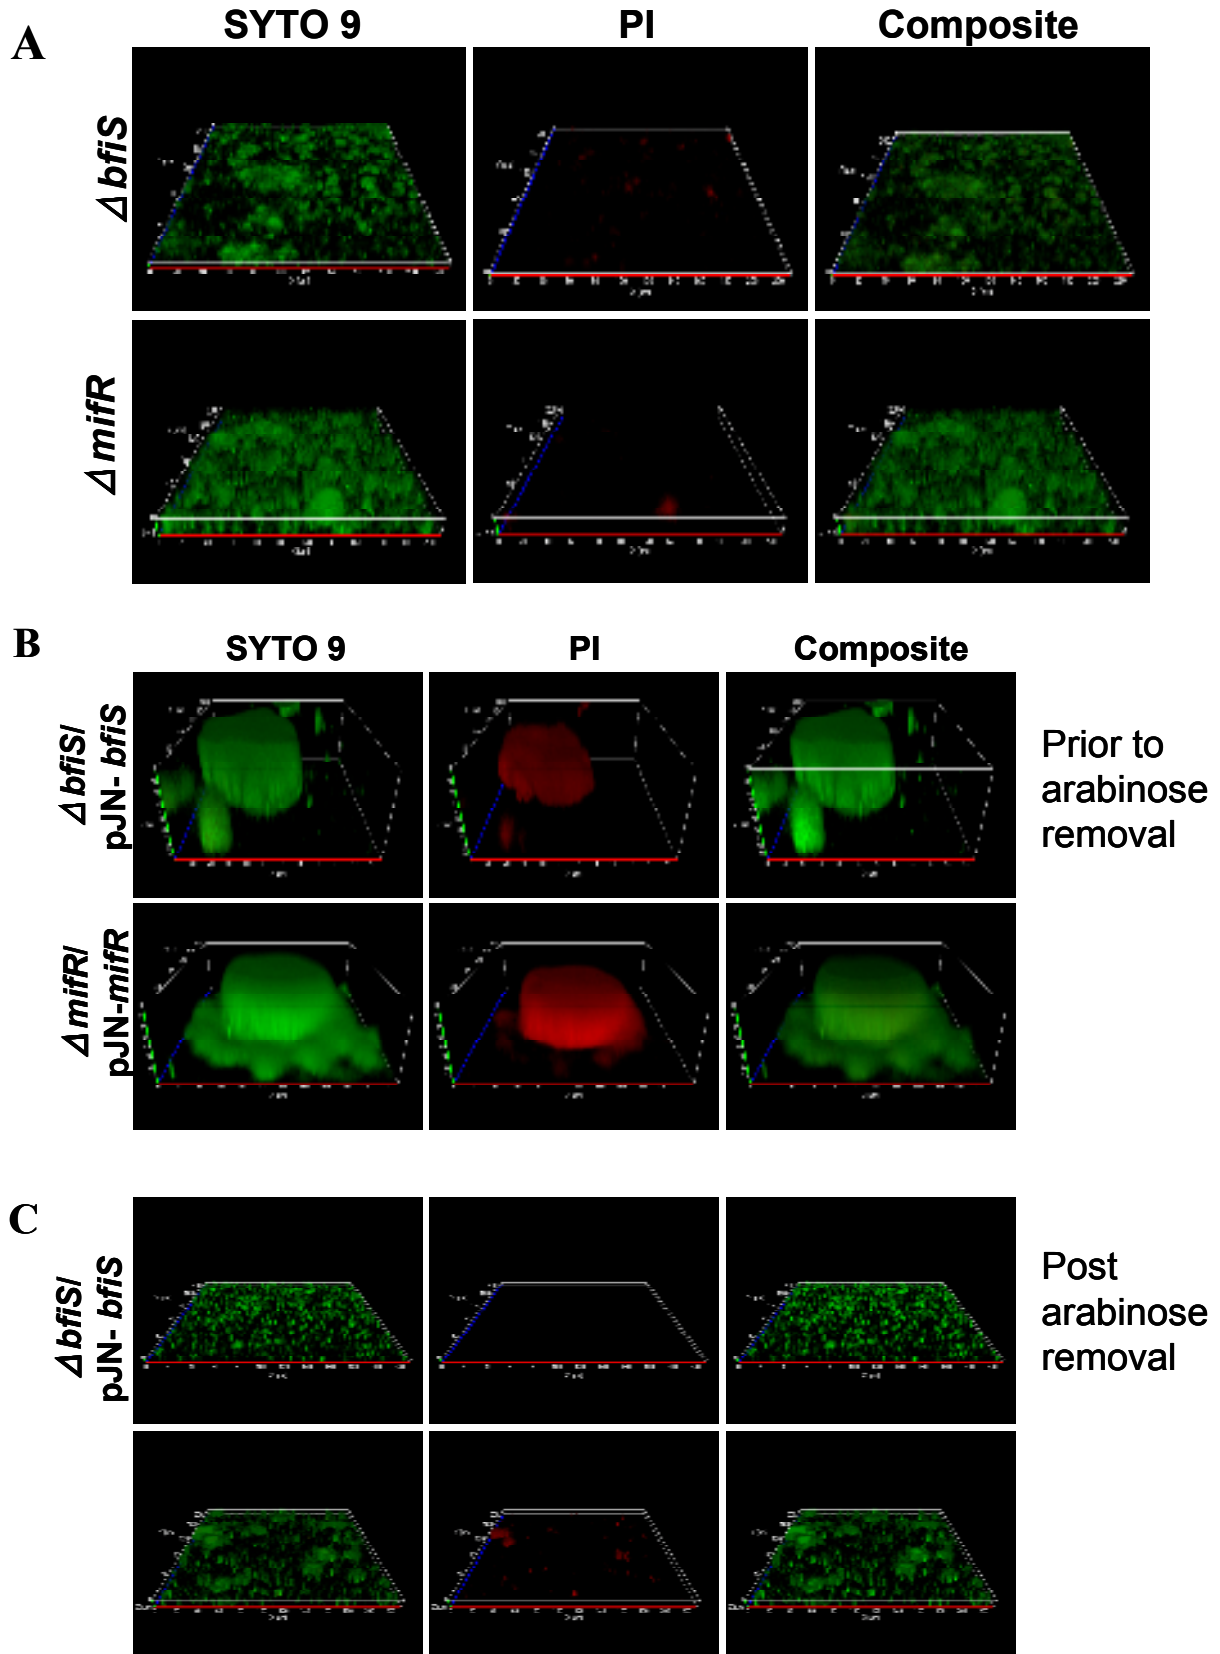

## SUPPLEMENTARY MATERIAL

**Figure S4. Detection of cell death as indicated by propidium iodide staining upon inactivation of *bfiS* and *mifR* in biofilms.** (A)  $\Delta bfiS$  and  $\Delta mifR$  biofilms, grown under continuous flow conditions for 144 hr, were stained with SYTO 9 and propidium iodide (PI) using the LIVE/DEAD BacLight viability kit. CSLM-acquired images were analyzed by splitting the green (SYTO 9) and red (PI) channels. (B) Confocal images of complemented  $\Delta bfiS$  and  $\Delta mifR$  biofilms bearing pJN-*bfiS* and pJN-*mifR*, respectively were grown in the presence of arabinose for 144 hr. (C) Following 144 hrs of growth in the presence of arabinose, arabinose was removed from the growth medium in order to inactivate transcription from the PBAD promoter. Biofilms were allowed to grow for an additional 72 hrs before confocal images were acquired.

SUPPLEMENTARY MATERIAL

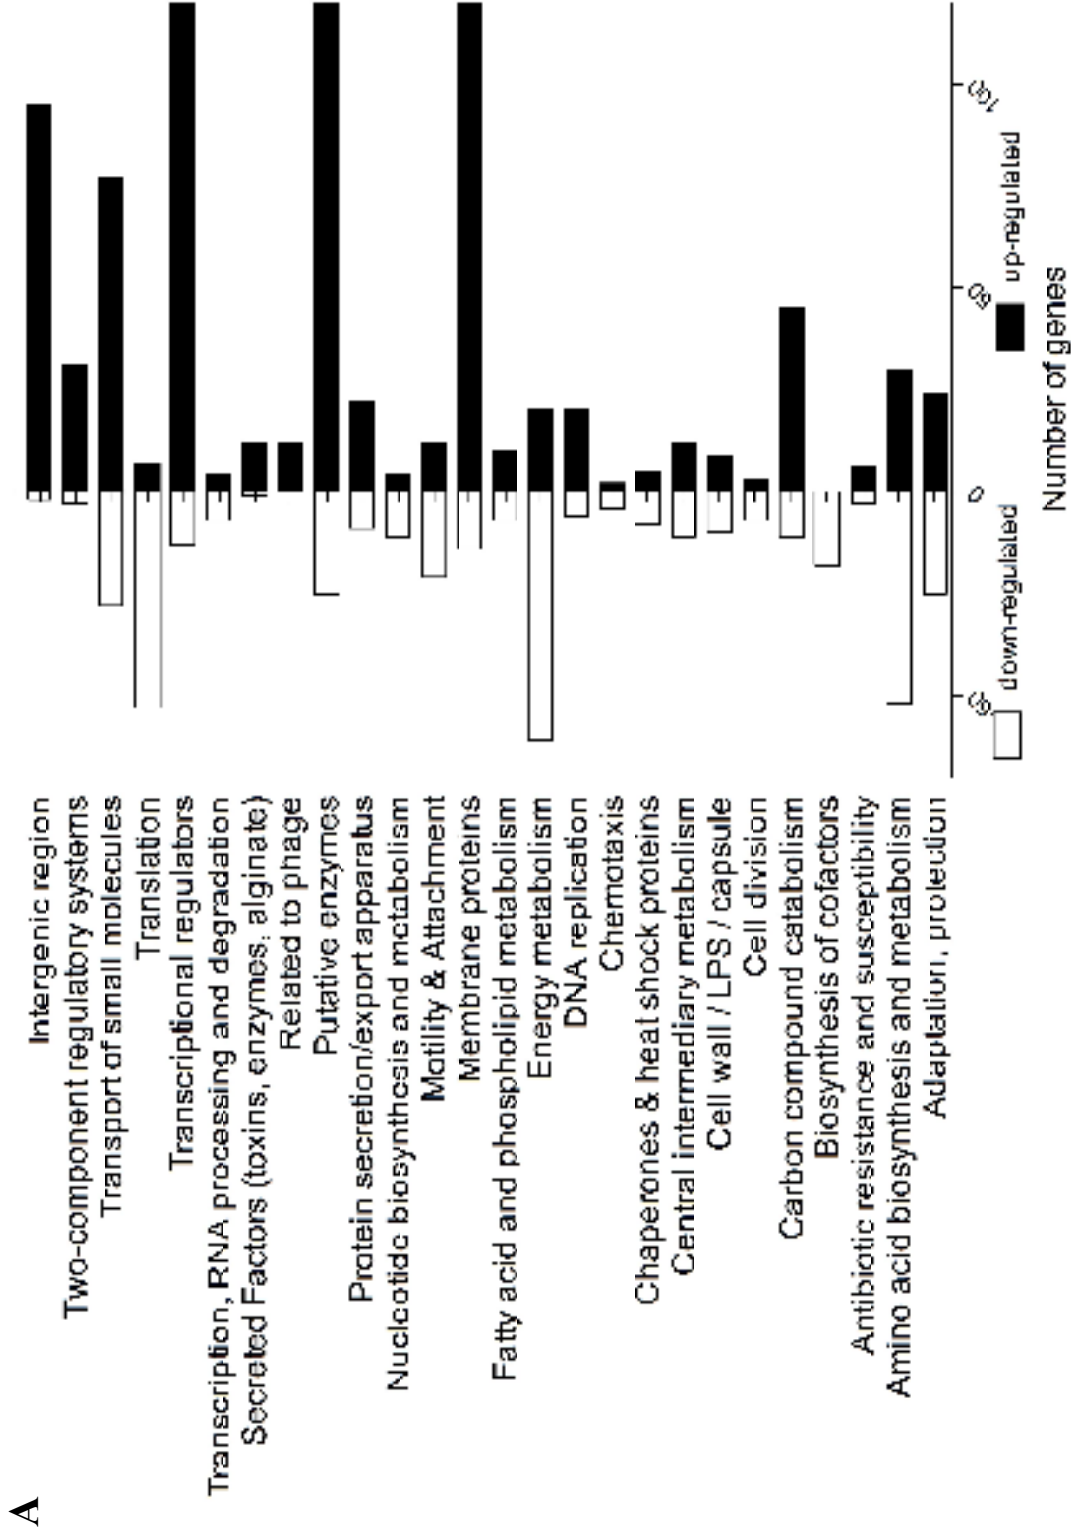

SUPPLEMENTARY MATERIAL

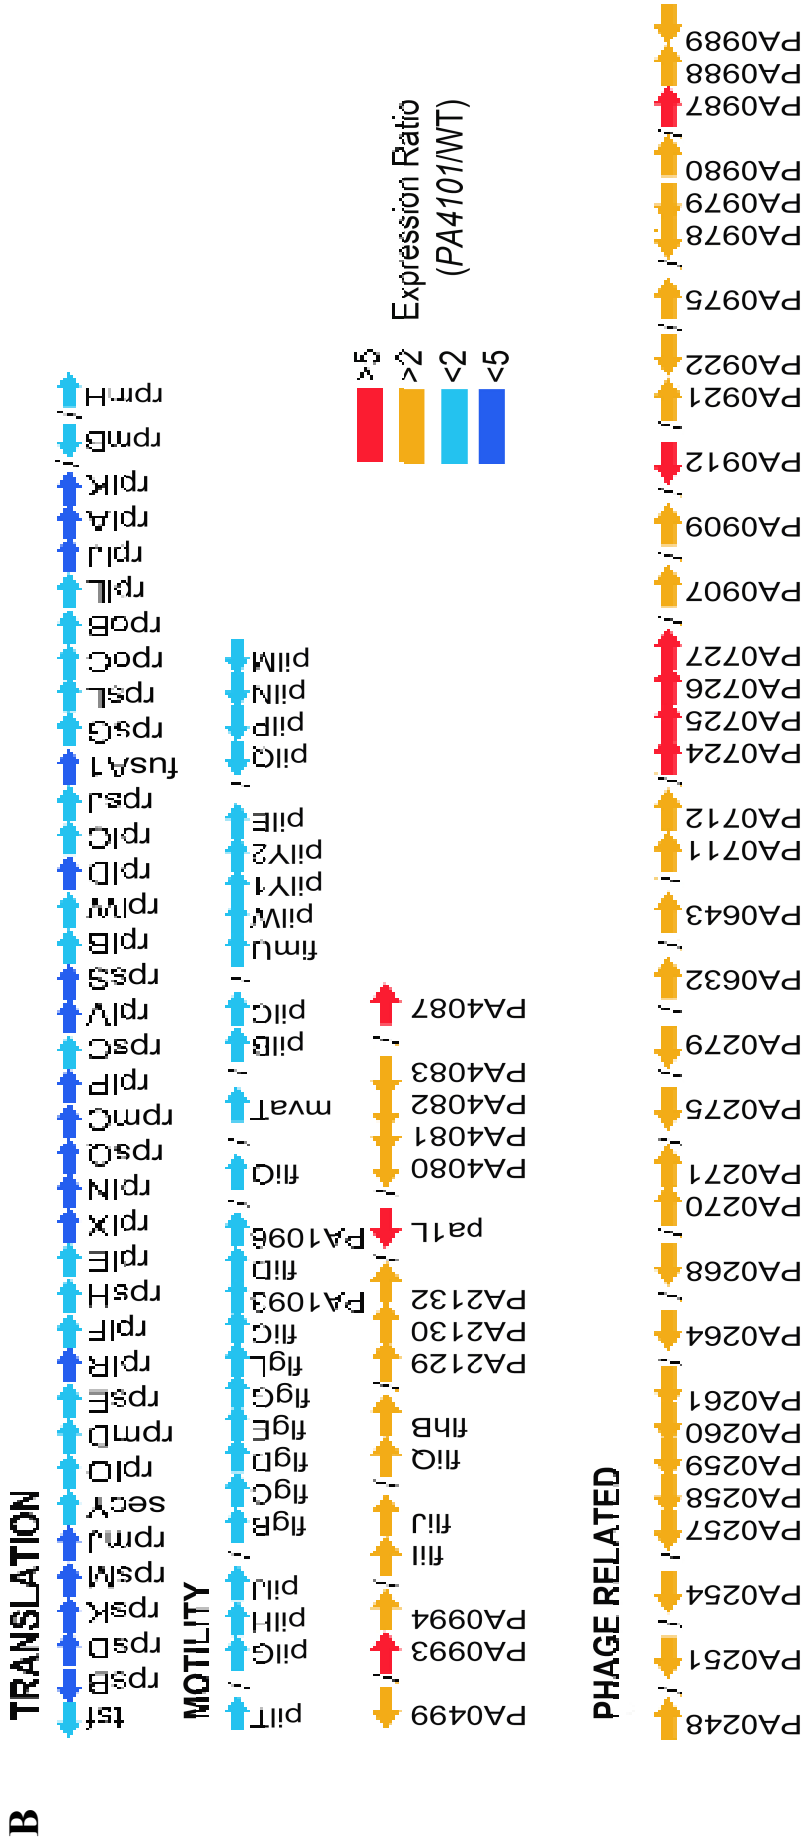

**Figure S5. Genome-wide transcriptional profiling in *P. aeruginosa* and *P. aeruginosa* *AbfmR* biofilms using Genomic Microarray. (A)** Overview of differentially expressed genes based on category. (B). Selected upregulated genes encoding phage proteins and downregulated genes involved in translation and motility. Shown are ratios of hybridization intensities of targets generated from *P. aeruginosa* and *P. aeruginosa* *bfmR* total RNAs based on triplicate experiments. Arrow direction indicates the gene orientation and connected arrows delineate putative operons; nonadjacent genes are separated by diagonal bars (Stover *et al.*, 2000). The complete data set is provided in Supplemental Tables S3-S4.



SUPPLEMENTARY MATERIAL

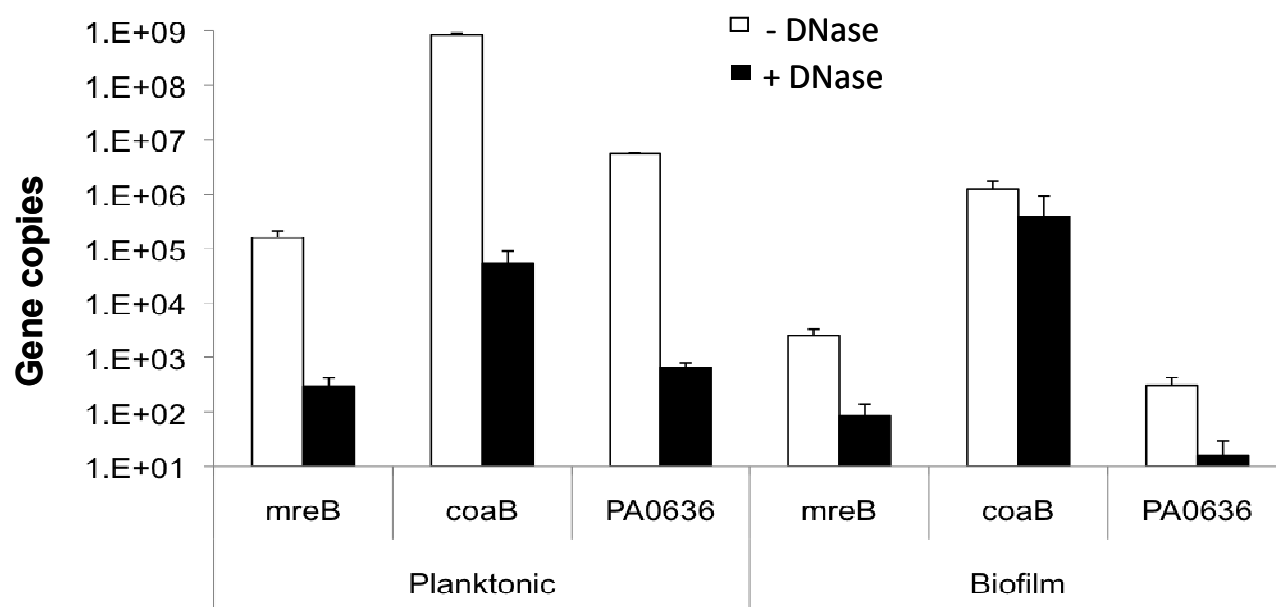

**Figure S6. Determination of *coaB* and PA0636 gene copy numbers present in supernatants obtained from *P. aeruginosa* grown planktonically and as biofilms prior to and post DNase I treatment.** Experiments were performed in triplicate. Error bars indicate standard deviation. \*, significantly different from *mreB* ( $p < 0.05$ ).

## SUPPLEMENTARY MATERIAL

### Supplementary References

- Bailey, J. & C. Manoil, (2002) Genome-wide internal tagging of bacterial exported proteins. *Nat Biotechnol* **20**: 839-842.
- Banin, E., M. L. Vasil & E. P. Greenberg, (2005) Iron and *Pseudomonas aeruginosa* biofilm formation. *PNAS* **102**: 11076-11081.
- Becher, A. & H. P. Schweizer, (2000) Integration-proficient *Pseudomonas aeruginosa* vectors for isolation of single-copy chromosomal lacZ and lux gene fusions. *Biotechniques* **29**: 948-952.
- Figurski, D. H. & D. R. Helinski, (1979) Replication of an origin-containing derivative of plasmid RK2 dependent on a plasmid function provided in trans. *Proceedings of the National Academy of Sciences of the United States of America* **76**: 1648-1652.
- Hoang, T. T., A. J. Kutchma, A. Becher & H. P. Schweizer, (2000) Integration-proficient plasmids for *Pseudomonas aeruginosa*: site-specific integration and use for engineering of reporter and expression strains. *Plasmid* **43**: 59-72.
- Liberati, N. T., J. M. Urbach, S. Miyata, D. G. Lee, E. Drenkard, G. Wu, J. Villanueva, T. Wei & F. M. Ausubel, (2006) An ordered, nonredundant library of *Pseudomonas aeruginosa* strain PA14 transposon insertion mutants. *Proc Natl Acad Sci* **103**: 2833-2838.
- Newman, J. R. & C. Fuqua, (1999) Broad-host-range expression vectors that carry the arabinose-inducible *Escherichia coli* araBAD promoter and the araC regulator. *Gene* **227**: 197-203.
- Petrova, O. E. & K. Sauer, (2009) A novel signaling network essential for regulating *Pseudomonas aeruginosa* biofilm development. *PLoS Pathogens* **5**: e1000668.
- Stover, C. K., X. Q. Pham, A. L. Erwin, S. D. Mizoguchi, P. Warrener, M. J. Hickey, F. S. L. Brinkman, W. O. Hufnagle, D. J. Kowalik, M. Lagrou, R. L. Garber, L. Goltry, E. Tolentino, S. Westbrook-Wadman, Y. Yuan, L. L. Brody, S. N. Coulter, K. R. Folger, A. Kas, K. Larbig, R. Lim, K. Smith, D. Spencer, G. K. S. Wong, Z. Wu, I. T. Paulsen, J. Reizer, M. H. Saier, R. E. W. Hancock, S. Lory & M. V. Olson, (2000) Complete genome sequence of *Pseudomonas aeruginosa* PAO1, an opportunistic pathogen. *Nature* **406**: 959-964.
